# Supplementary material for: Innate Immune Pathways Promote Oligodendrocyte Progenitor Cell Recruitment to the Injury Site in Adult Zebrafish Brain
Source: MDPI journal article supplement (doi:10.3390/cells11030520), 2022-02-02

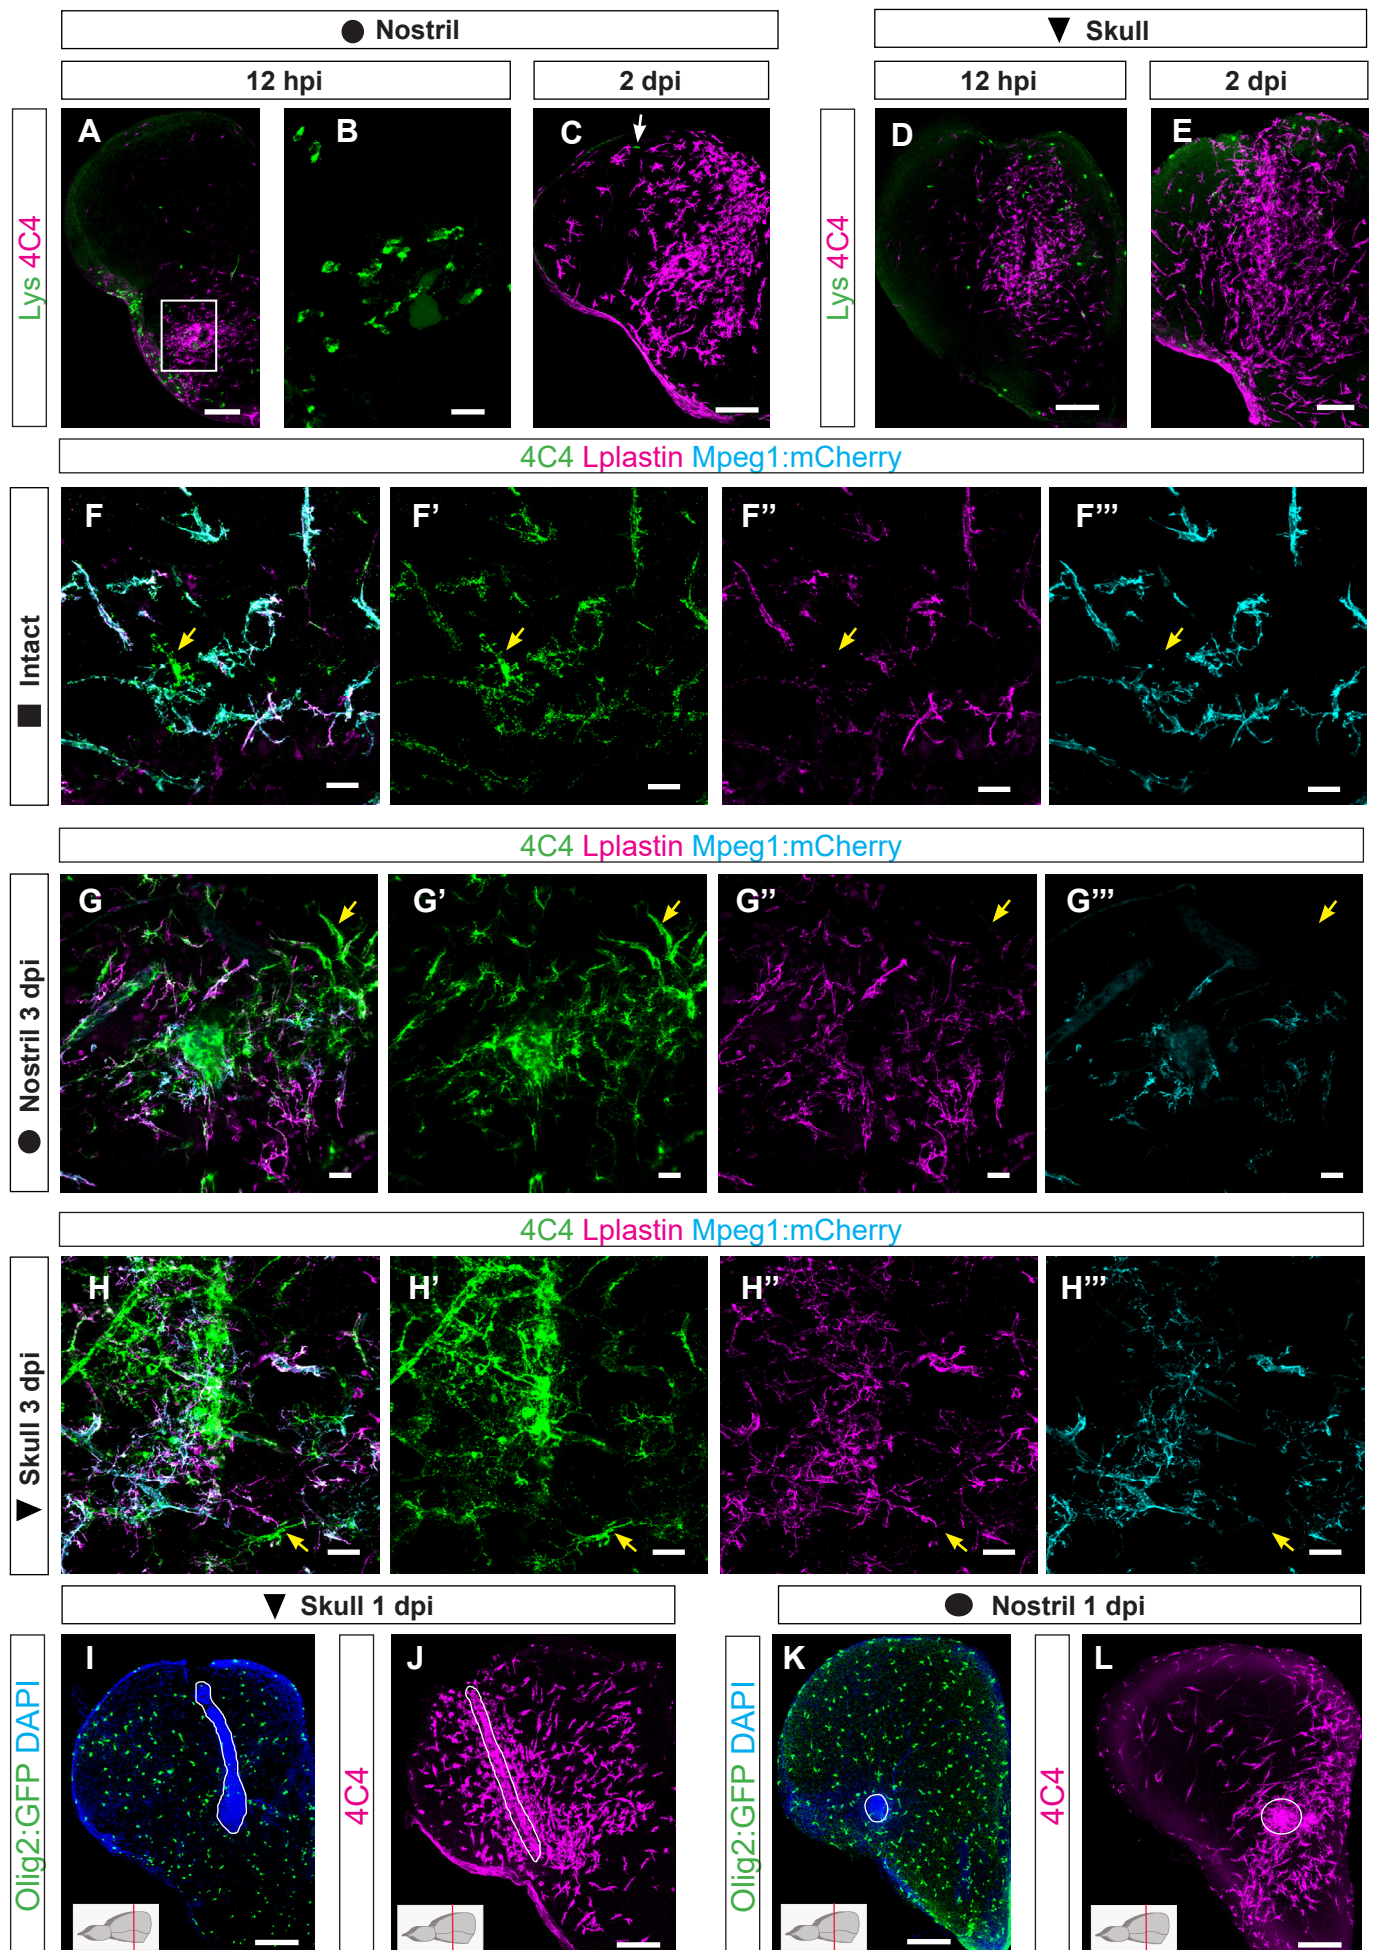

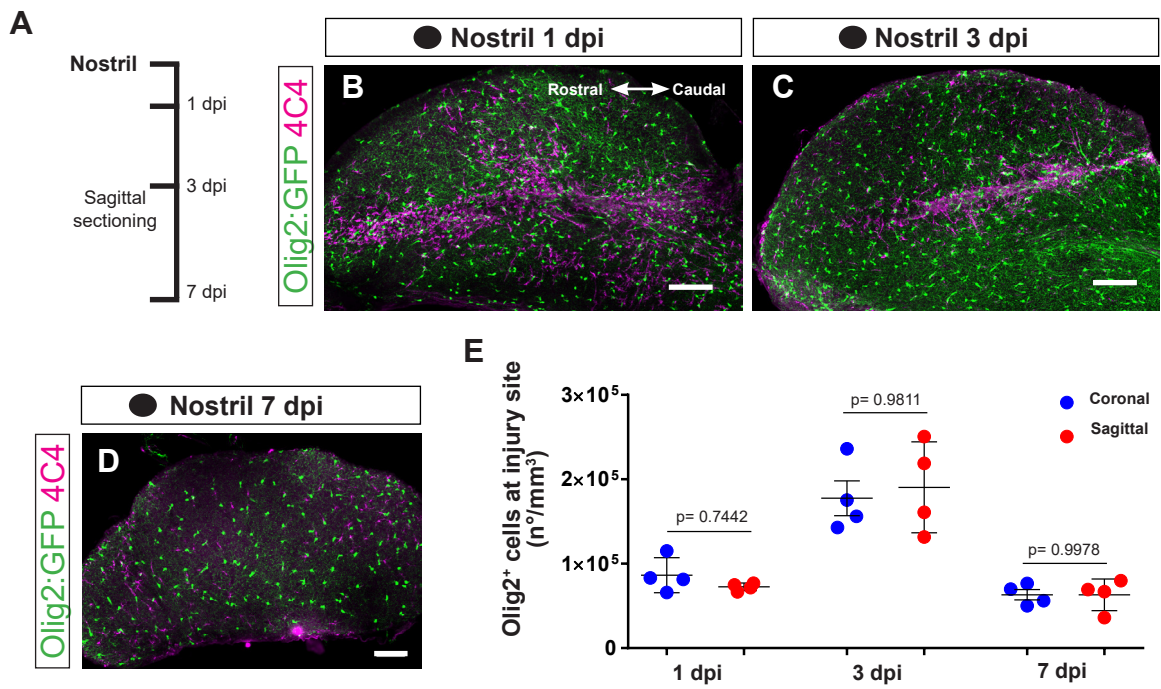

Sanchez-Gonzalez et al., 2021 Supplementary Figure S2

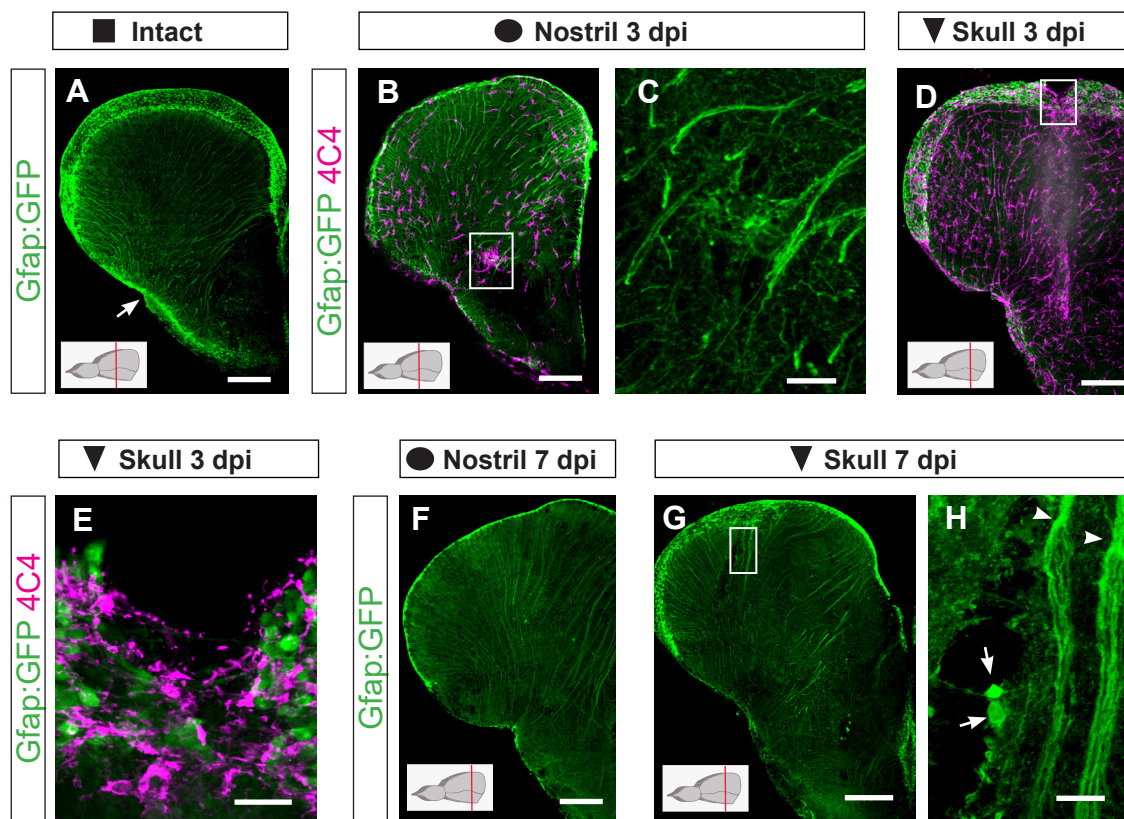

Sanchez-Gonzalez et al., 2021 Supplementary Figure S3







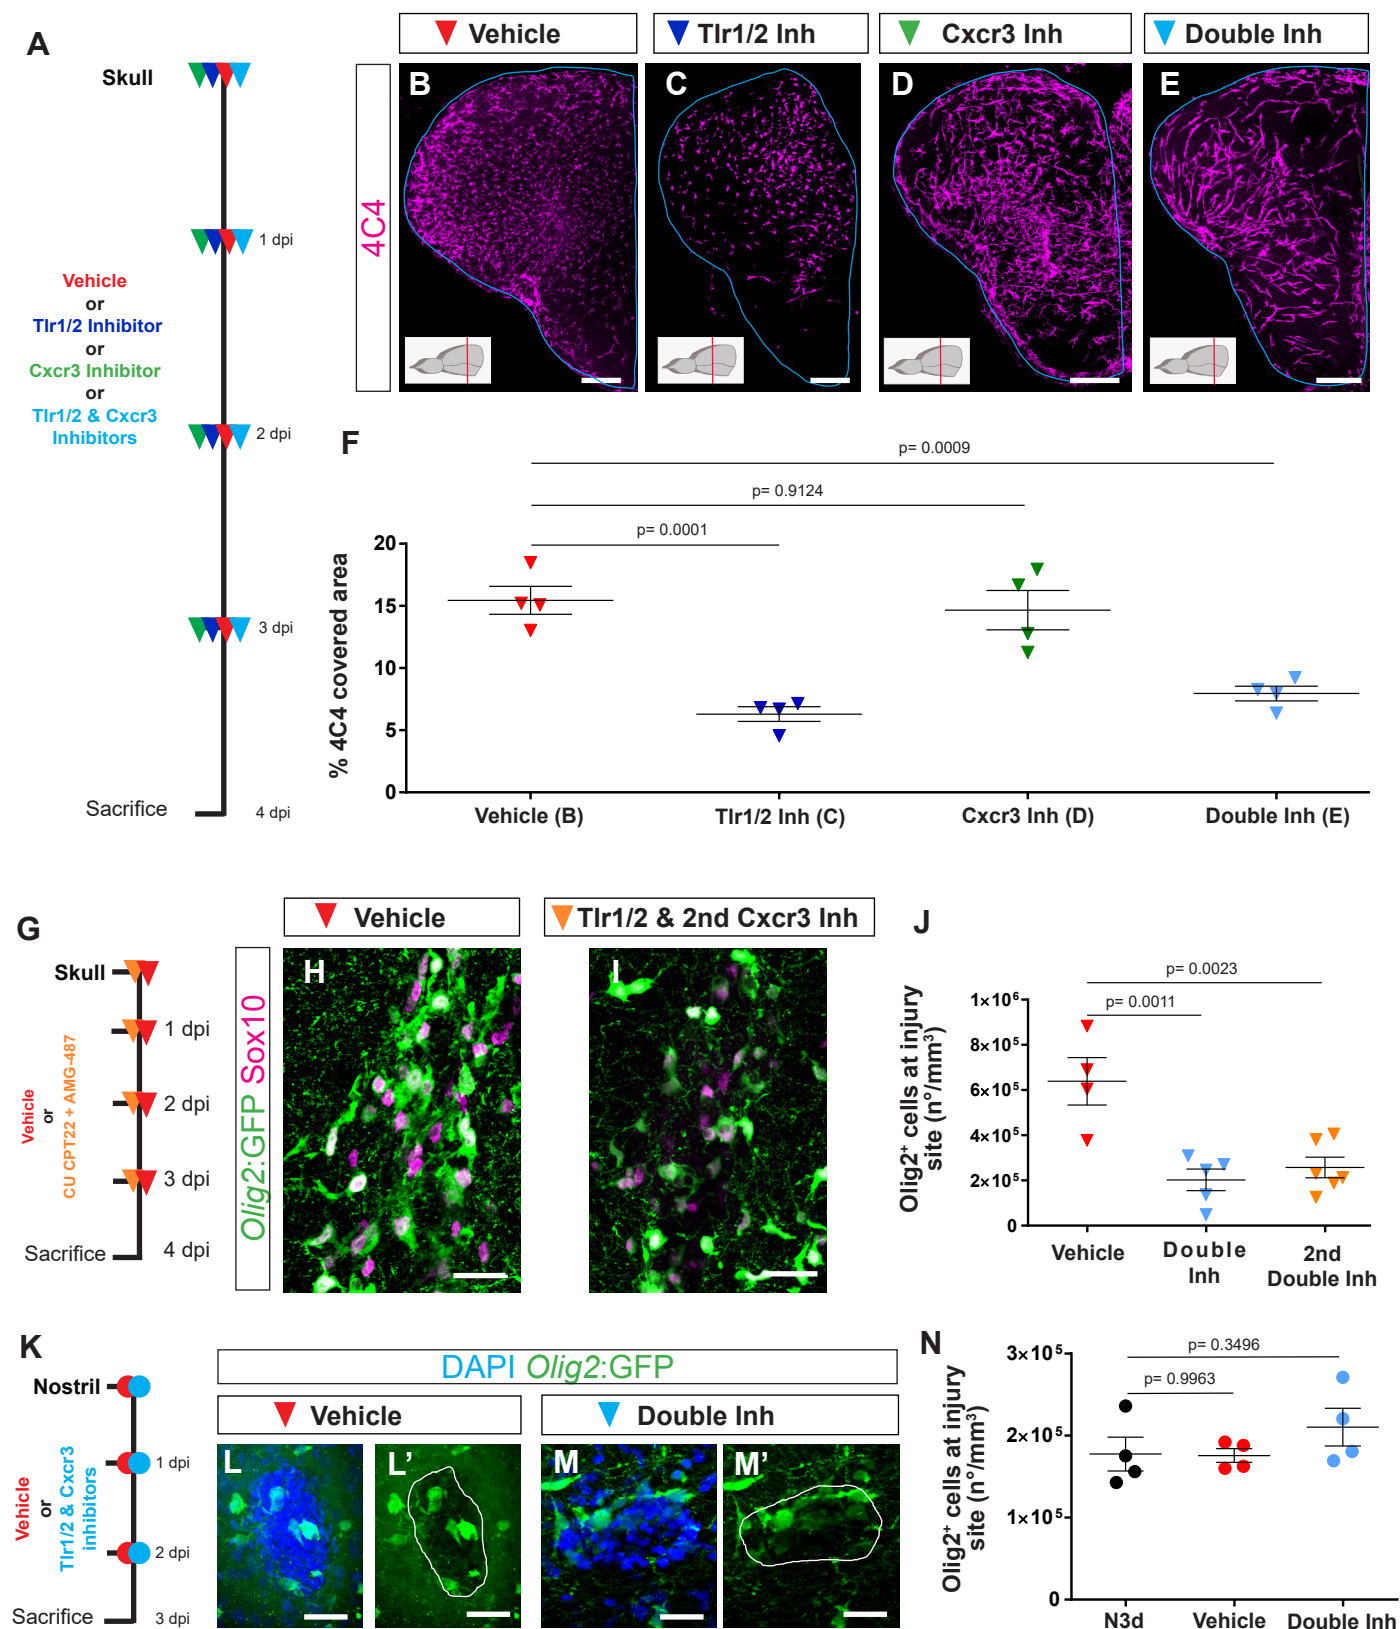

Sanchez-Gonzalez et al., 2021 Supplementary Figure S5

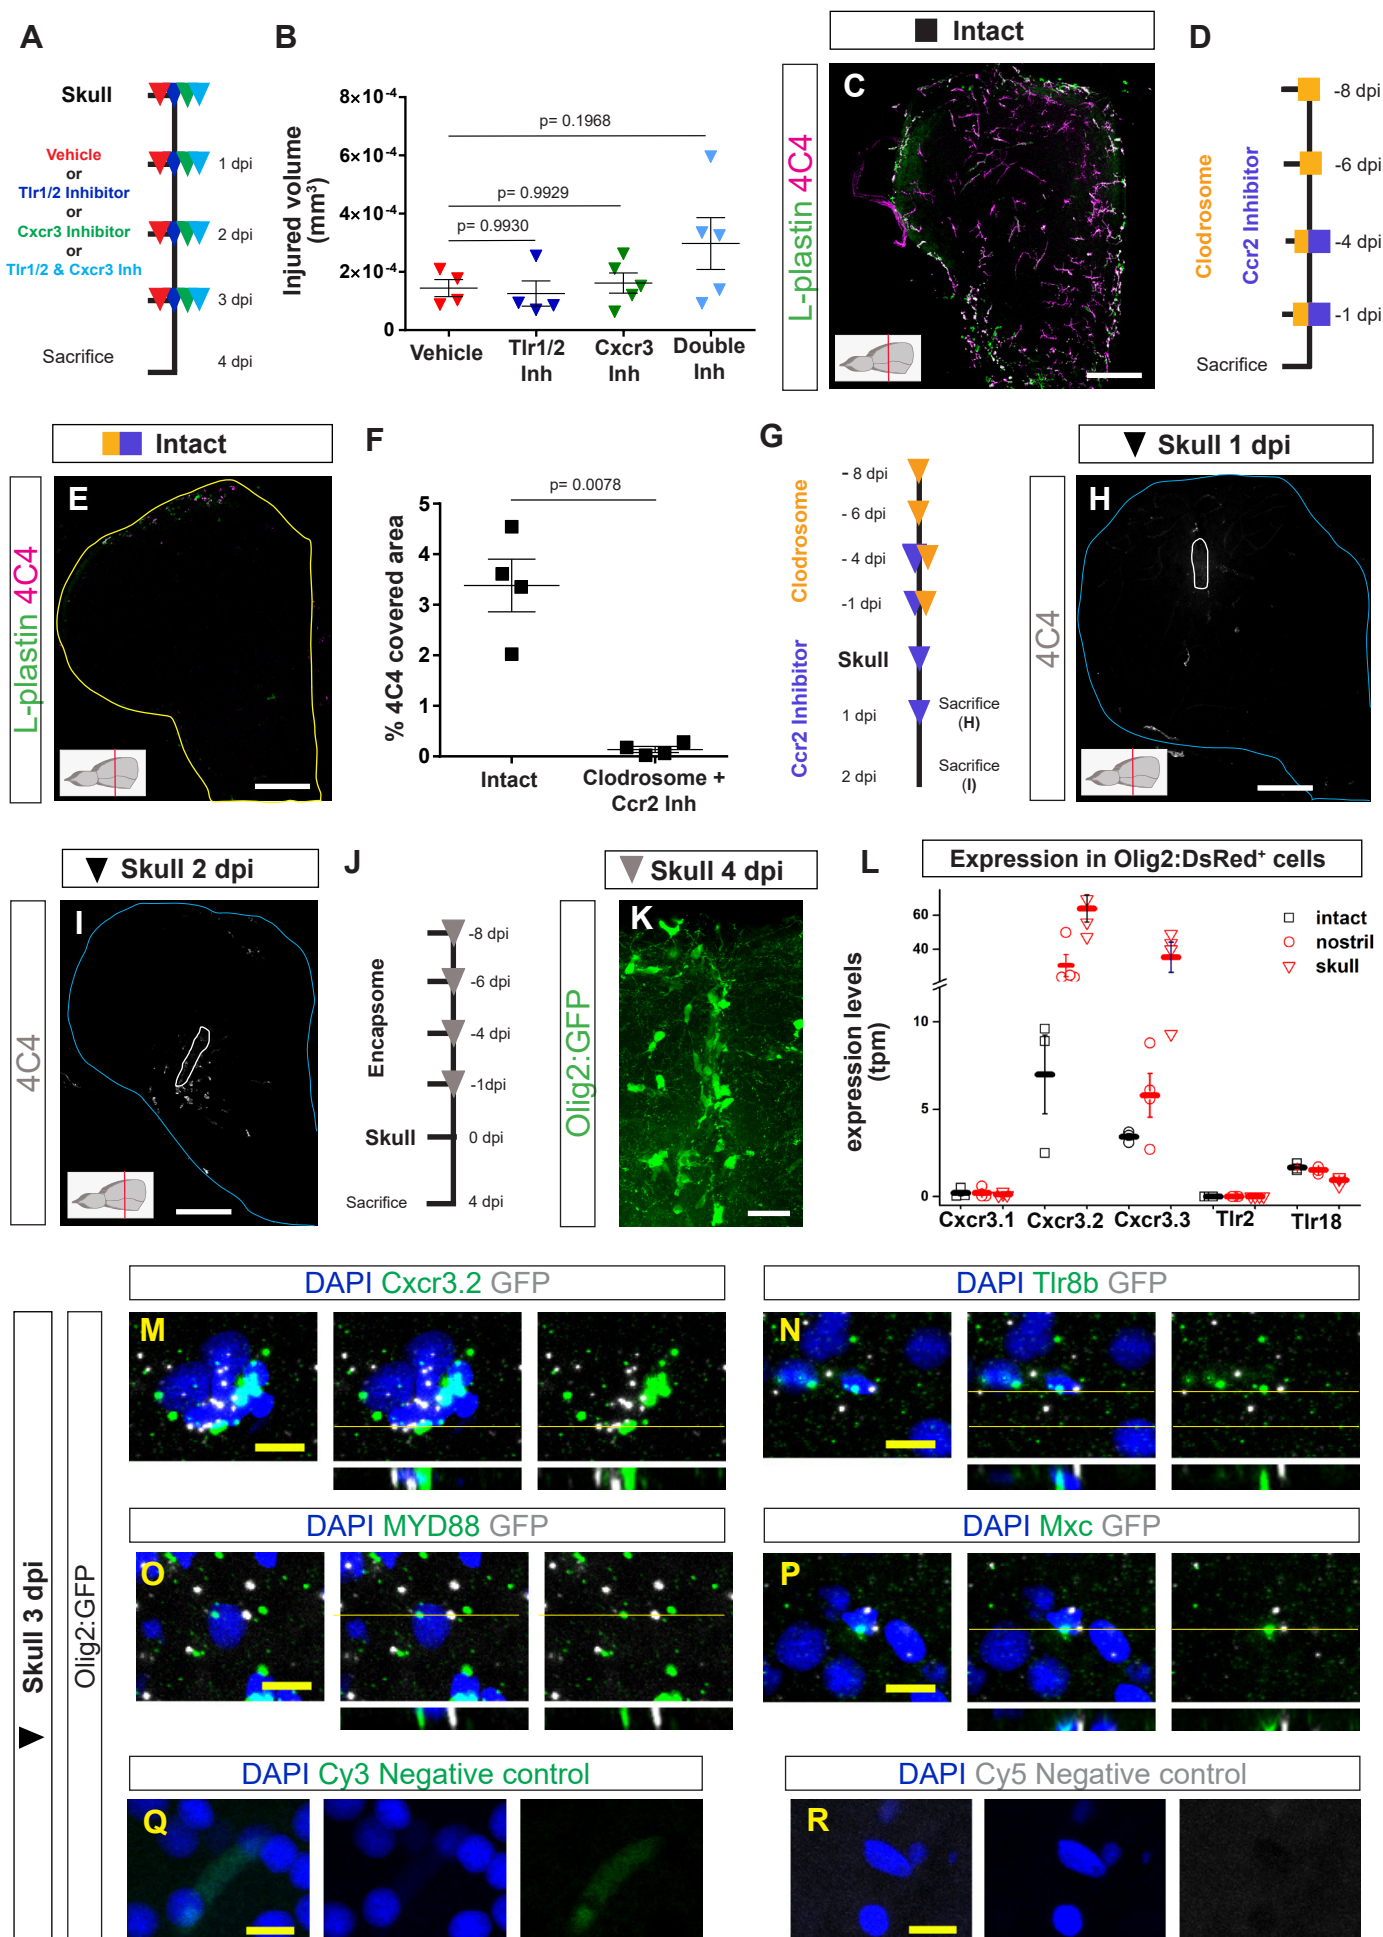

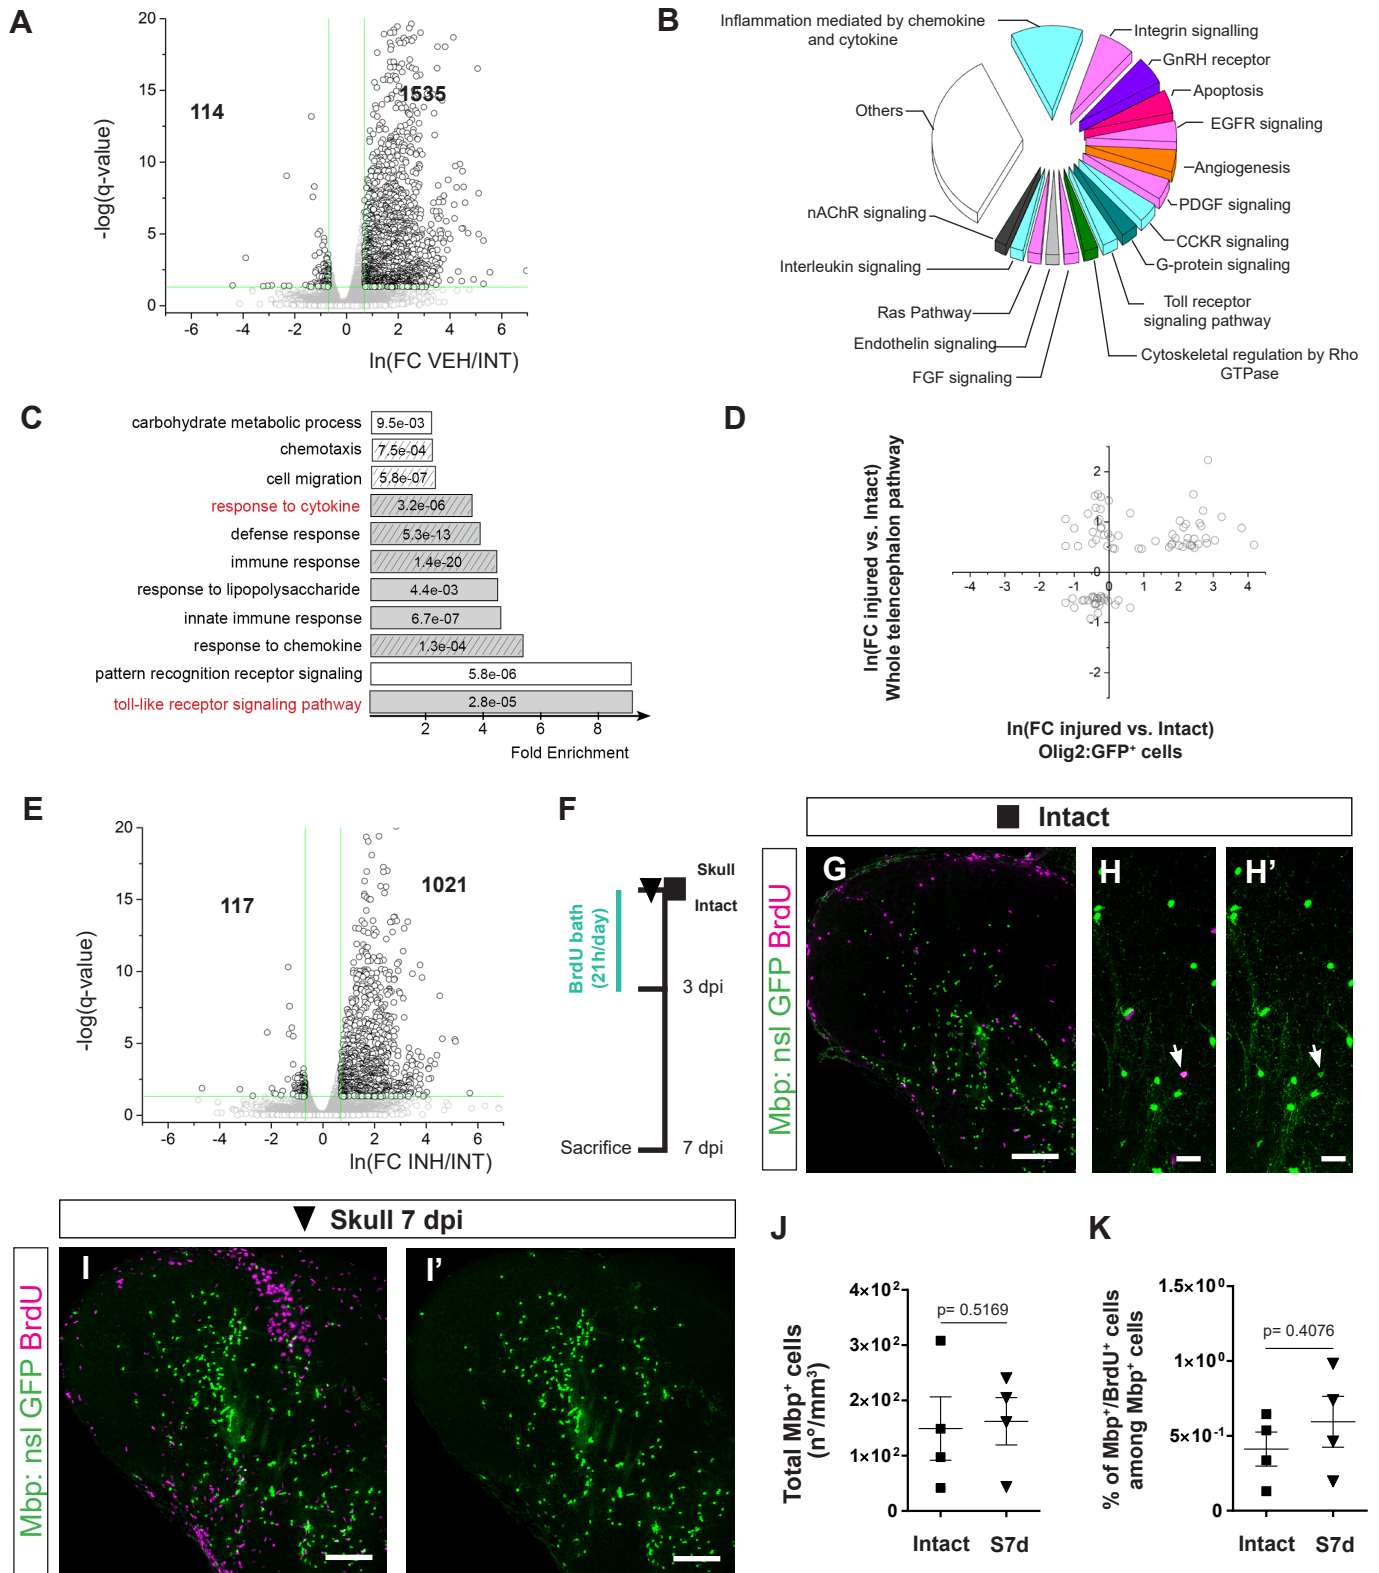

Sanchez-Gonzalez et al., 2021 Supplementary Figure S7



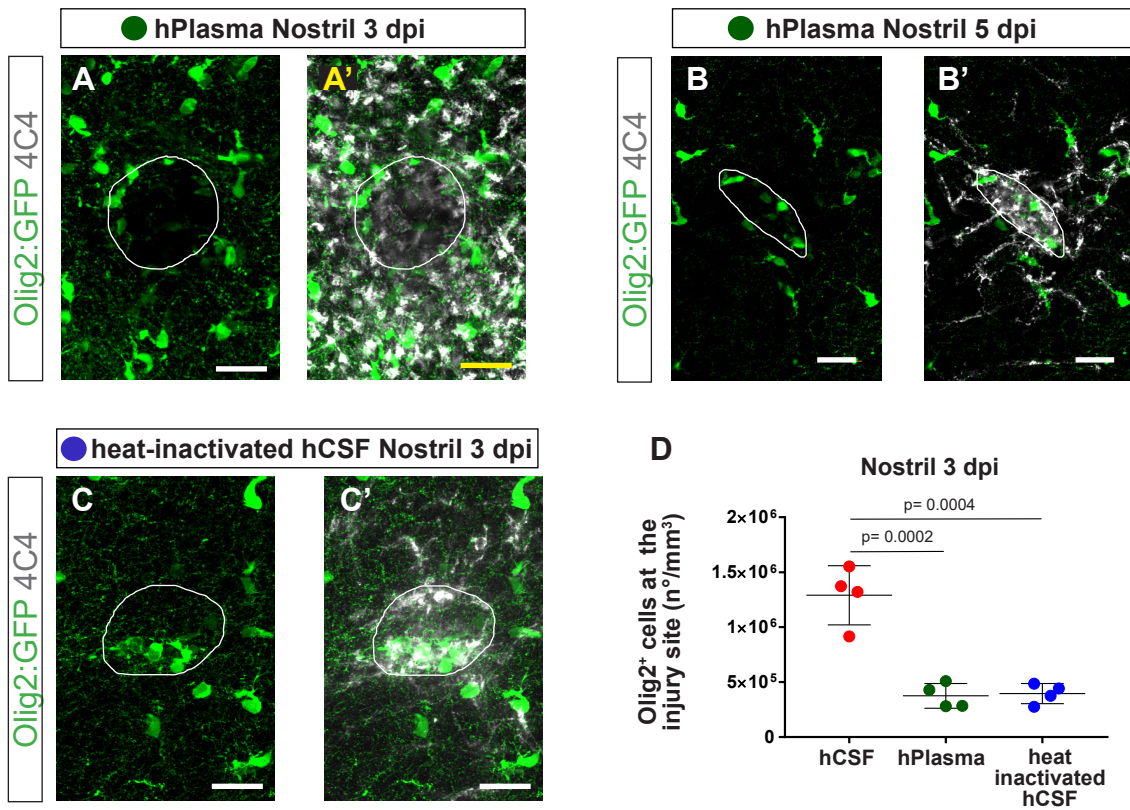

Sanchez-Gonzalez et al., 2021 Supplementary Figure S8

## A mutation in Cxcr3

WT allele 35 D F S D S P P C P Q D F S L N F D R T F L P A P Y S L L F L L G L L G N  
gactttctctgactcccgccttgcacacaggtttgagcctggaactttgacagcaacttctctgacagccctacagcctctctcttctgtctgggctgcttaggcaat

MUT allele 1 35 D F S D S P P C P A H R I S A \* T L T E P S C Q P S T A S S S C W G C \* A M  
gactttctctgactcccgccttgcacacaggtttcagcctggaactttgacagcaacttctctgacagccctacagcctctcttctgtctgggctgcttaggcaat

MUT allele 2 35 D F S D S P P C P A H R I S A \* T L T E P S C Q P S T A S S S C W G C \* A M  
gactttctctgactcccgccttgcacacaggtttcagcctggaactttgacagcaacttctctgacagccctacagcctctcttctgtctgggctgcttaggcaat

WT allele 71 G A V A A V L L S Q R T A L S S T D T F L L H L A V A D V L L V L T L P  
ggggcggtgctgctgtgctactgagtcagcgcactgccctgagcagcagcgaaacctctctgctcaccctgctgtgagccgatcttctgctggtgcttactcttcca

MUT allele 1 71 G R W L L C Y \* V S A L P \* A A R T P S C S T W L \* V L T L P  
ggggcggtgctgctgtgctactgagtcagcgcactgccctgagcagcagcgaaaccttctctgctcaccctgctgtgagccgatcttctgctggtgcttactcttcca

MUT allele 2 71 G R W L L C Y \* V S A L P \* A A R T P S C S T W L \* V L T L P  
ggggcggtgctgctgtgctactgagtcagcgcactgccctgagcagcagcgaaaccttctctgctcaccctgctgtgagccgatcttctgctggtgcttactcttcca

### B mutation in Tlr2

WT allele 57 L D L S F N K I T Y I G H G D L R A C A N L Q V L M L K S S R I N T I E G D A  
cttgacctgtctttcaacaaacatcacctacattggcctggtgacctccgagcgtgtgcaacctccaggttctgatgttgaagtcacagagaatcaatacaatagaggagacgcc

MUT allele 1 57 L D L S F N K M V T S E R V R T S R F C S P A E S I Q R E T P  
cttgacctgtctttcaacagatggtagacctccgagcgtgtgcaacctccaggttctgatgttgaagtcacagagaatcaatacaatagaggagacgcc

MUT allele 2 57 L D L S F N K I T Y I G  
cttgacctgtctttcaacagatcacctacattggc

WT allele 96 F Y S L G S L E H L D L S D N H L S S L S S S W F G P L S S L K Y L N L M G N  
ttttattctctcgtggcagtccttgaacatttggatttctctgataatcacctatctagtttatcttccctcctggttcggggcccttctcctcttgaatactttaaaccttaatgggaat

MUT allele 1 F I L W A V L N I W I C L I A I T Y L V Y L P P G S G G P F P L N T T W E I  
ttttattctctcgtggcagtccttgaacatttggatttctctgataatcacctatctagtttatcttccctcctggttcggggcccttctcctcttgaatactttaaaccttaatgggaat

MUT allele 2

WT allele 135 P Y Q T L G V T S L F P N L T N L Q T L R I G N V E T F S E I R R I D F A G L  
ccttaccagacactcgtgggtaacatcgtcttttcccaatctcaaaatttcaaaaccctcaggataggaatgtagagacttcagtgagataaggagataagattttgctgggctg

MUT allele 1 L T R H W G \* H R F F P I S Q I Y K P S G E M R L S V R G E I L L G  
ccttaccagacactcgtgggtaacatcgtcttttcccaatctcaaaatttcaaaaccctcaggataggaatgtagagacttcagtgagataaggagataagattttgctgggctg

MUT allele 2

WT allele 174 T S L N E L E I K A L S L R N Y Q S Q S L K S I R D I H H L T L H L S E S  
acttctctcaatgaacttgaaattagcgattagctcctcggaattatcagtcctcaaaagtcctaaagtcgactcgggacatccatcacctgactcttcaacttaagcgagtct

MUT allele 1 L L S M N L K L R H V S G I I S P K V S R S A T S I T L F T A S  
acttctctcaatgaacttgaaattagcgattagctcctcggaattatcagtcctcaaaagtcctaaagtcgactcgggacatccatcactgactcttcaacttaagcgagtct

MUT allele 2 69 I H H L T L H L S E S  
atccatcactgactcttcaacttaagcgagtct

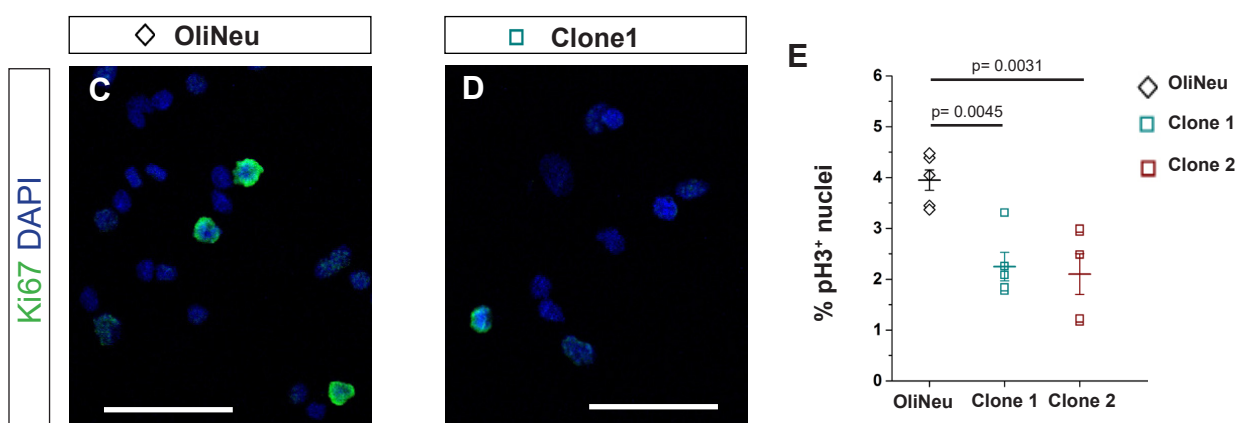

Supplement: s1 [file s1]
