# Supplementary material for: Innate Immune Pathways Promote Oligodendrocyte Progenitor Cell Recruitment to the Injury Site in Adult Zebrafish Brain
Source: MDPI journal article supplement (doi:10.3390/cells11030520), 2022-02-02
Supplement: s1 [file s1]

**Table S1.** List of all the primary antibodies used in this study, and the correspondent information about each antibody.

| <b>Antigen</b>             | <b>Source</b>                                                 | <b>Dilution</b> | <b>Host, isotype</b> | <b>Pre-treatment</b>                   |
|----------------------------|---------------------------------------------------------------|-----------------|----------------------|----------------------------------------|
| anti-fish leukocytes (4C4) | Health Protection Agency Culture Collections 92092321, 7.4.C4 | 1:500           | Mouse IgG1           | -                                      |
| BrdU                       | Serotec (MCA2060)                                             | 1:200           | Rat, IgG2a           | 2N HCl 30min                           |
| GFP                        | Aves lab (GFP-1020)                                           | 1:700           | Chicken, IgY         | -                                      |
| Sox10                      | Genetex (GTX128374)                                           | 1:2000          | Rabbit               | -                                      |
| HuC/HuD                    | Abcam (ab210554)                                              | 1:500           | Rabbit               |                                        |
| L-plastin                  | Genetex (GTX114524)                                           | 1:200           | Rabbit               | Dako target retrieval solution (S1699) |
| phospho-Histone H3         | Millipore (Cat# 06-570)                                       | 1:500           | Rabbit               |                                        |
| Ki67                       | Thermofisher (Cat# 14-5698-80)                                | 1:500           | Rat                  |                                        |

**Table S2.** List of primers used in this study for RT-qPCR.

| <b>Target</b> | <b>Forward (5'→3')</b> | <b>Reverse (3'→5')</b> |
|---------------|------------------------|------------------------|
| <i>Tlr2</i>   | ACCTGCTCCAATCTTCAGCTC  | TGCTTTCAAGCTCCCGTTCT   |

**Table S3.** List of recombinant proteins used for the screening in Figure 7G (www.rndsystems.com).

| <b>Human recombinant protein</b> | <b>Concentrations</b>              | <b>Catalog number</b> |
|----------------------------------|------------------------------------|-----------------------|
| TGFbeta                          | 0.04 ng/mL; 0.12 ng/mL; 0.2 ng/mL  | 628-LK-025            |
| Ccl17                            | 2 ng/mL; 4 ng/mL; 6 ng/mL          | 364-DN-025            |
| SDF                              | 4 ng/mL; 16 ng/mL; 24 ng/mL        | 6448-SD-025           |
| SCF                              | 1 ng/mL; 2.5 ng/mL; 5 ng/mL        | 255-SC-010            |
| Ccl5                             | 1 ng/mL; 2.5 ng/mL; 5 ng/mL        | 278-RN-010            |
| PDGFbeta                         | 1.5 ng/mL; 3.5 ng/mL; 6 ng/mL      | AFL220-010            |
| MOSM                             | 0.05 ng/mL; 0.17 ng/mL; 0.3 ng/mL. | 295-OM-010            |
| Ccl15                            | 0.2 ng/mL; 4 ng/mL; 8 ng/mL.       | 628-LK-025            |
| Cxcl9                            | 0.1 µg/mL; 0.2 µg/mL; 0.4 µg/mL    | 392-MG-010            |
| MCSF                             | 0.5 ng/mL; 1 ng/mL; 1.5 ng/mL      | 216-MC-005            |
| Ccl7                             | 0.02 µg/mL; 0.1 µg/mL; 0.5 µg/mL   | 282-P3-010            |
| Ccl8                             | 0.03 µg/mL; 0.05 µg/mL; 0.1 µg/mL  | 281-CP-010            |
| INF gamma                        | 0.15 ng/mL; 0.5 ng/mL; 0.75 ng/mL  | 285-IF-100            |
| IL-15                            | 0.3 ng/mL; 1.3 ng/mL; 2.6 ng/mL    | 247-ILB-005           |
| IL-12                            | 0.01 ng/mL; 0.02 ng/mL; 0.05 ng/mL | 219-IL-005            |
| IL-10                            | 0.15 ng/mL; 0.5 ng/mL; 0.75 ng/mL  | 217-IL-005            |
| IL-8beta                         | 0.5 ng/mL; 1.25 ng/mL; 2.5 ng/mL   | 208-IL-010            |
| IL-3                             | 0.02 ng/mL; 0.05 ng/mL; 0.1 ng/mL  | 203-IL-010            |
| IL1-beta                         | 1 pg/mL; 6 pg/mL; 12 pg/mL         | 201-LB-005            |
| IGF-1                            | 0.3 ng/mL; 1 ng/mL; 1.5 ng/mL      | AFL291-200            |
| EGF                              | 20 pg/mL; 60 pg/mL; 100 pg/mL      | AFL236-200            |
| Cxcl11                           | 1 ng/mL; 2.5 ng/mL; 5 ng/mL        | 672-IT-025            |
| Cxcl10                           | 0.03 ug/mL; 0.1 ug/mL; 0.18 ul/mL  | 266-IP-010            |
| Cxcl5                            | 3 ng/mL; 9 ng/mL; 15 ng/mL         | 254-XB-025            |
| Cxcl1                            | 1 ng/mL; 0,15 µg/mL; 0.3 µg/mL     | 275-GR-010            |
| Ccl22                            | 0.5 ng/mL; 1.5 ng/mL; 3 ng/mL      | 336-MD-025            |
| Ccl2                             | 5 ng/mL; 25 ng/mL.; 30 ng/mL.      | 279-MC-010            |
| Ccl1                             | 1.5 ng/mL; 4.5 ng/mL; 9 ng/mL      | 272-I-010             |
| Angiogenin                       | 2.5 ug/mL; 5 ug/mL; 10 ug/mL       | 265-AN-250            |

**Table S4.** Microarray data illustrating the GO Terms Biological Processes enriched in genes commonly or exclusively regulated in skull and nostril injury at different time points (related to Figure 2B).

**Commonly regulated GO terms 1dpi (Figure 2B)**

| <b>GO Term</b>                                                                                   | <b>Number of genes</b> | <b>p-value</b> | <b>Genes</b>              | <b>Fold Enrichment</b> |
|--------------------------------------------------------------------------------------------------|------------------------|----------------|---------------------------|------------------------|
| GO:0051549~<br>positive regulation of keratinocyte migration                                     | 3                      | 0.002554       | MMP9, SERPINE1, HBEGF     | 38.19                  |
| GO:0051085~<br>chaperone mediated protein folding requiring cofactor                             | 3                      | 0.006889       | ERO1L, H2-DMA, CD74       | 23.50                  |
| GO:0060397~ JAK-STAT cascade involved in growth hormone signaling pathway                        | 3                      | 0.006889       | PTPN6, SOCS3, STAT3       | 23.50                  |
| GO:0019886~<br>antigen processing and presentation of exogenous peptide antigen via MHC class II | 3                      | 0.007986       | IFI30, H2-DMA, CD74       | 21.82                  |
| GO:0051279~<br>regulation of release of sequestered calcium ion into cytosol                     | 3                      | 0.007986       | CYBA, PTPN6, CORO1A       | 21.82                  |
| GO:0016064~<br>immunoglobulin mediated immune response                                           | 4                      | 0.001404       | C4B, INPP5D, H2-DMA, CD74 | 17.71                  |

|                                                                                          |   |          |                                                         |       |
|------------------------------------------------------------------------------------------|---|----------|---------------------------------------------------------|-------|
| GO:0030574~<br>collagen catabolic<br>process                                             | 4 | 0.001593 | CTSK, MMP9, CTSS,<br>MMP14                              | 16.97 |
| GO:0007159~<br>leukocyte cell-cell<br>adhesion                                           | 4 | 0.001797 | ITGAL, ITGB2L, FERMT3,<br>ITGB1                         | 16.29 |
| GO:0035987~<br>endodermal cell<br>differentiation                                        | 4 | 0.002505 | ITGB2L, MMP9, MMP14,<br>FN1                             | 14.54 |
| GO:0051603~<br>proteolysis involved<br>in cellular protein<br>catabolic process          | 8 | 1.48E-06 | SCPEP1, CTSK, PSMB7,<br>LGMN, CTSA, CTSC,<br>CTSS, CTSN | 14.04 |
| GO:0070527~<br>platelet aggregation                                                      | 5 | 4.51E-04 | PTPN6, FERMT3, CSRP1,<br>CLIC1, MYH9                    | 13.76 |
| GO:0042517~<br>positive regulation<br>of tyrosine<br>phosphorylation of<br>Stat3 protein | 4 | 0.003061 | HES5, IL6ST, STAT3,<br>CSF1R                            | 13.57 |
| GO:0048147~<br>negative regulation<br>of fibroblast<br>proliferation                     | 4 | 0.003686 | MMP9, IFI30, C1QL4,<br>FTH1                             | 12.73 |
| GO:0007017~<br>microtubule-based<br>process                                              | 4 | 0.007431 | TUBA8, TUBA3B, TUBB6,<br>TUBB4B                         | 9.93  |
| microtubule-based<br>process                                                             | 6 | 4.31E-04 | TNFRSF1A, GPSM3,<br>SERPINE1, TGM2, CTSS,<br>ADAM8      | 9.40  |
| GO:0007160~ cell-<br>matrix adhesion                                                     | 6 | 0.001055 | ITGAL, ITGB2L, ITGB7,<br>ADAM8, ITGB1, FN1              | 7.73  |
| GO:0071260~<br>cellular response to<br>mechanical stimulus                               | 6 | 0.001247 | CYBA, TNFRSF1A, IRF1,<br>CNN2, FAS, ITGB1               | 7.45  |

|                                                                              |    |          |                                                                                          |      |
|------------------------------------------------------------------------------|----|----------|------------------------------------------------------------------------------------------|------|
| GO:0071347~<br>cellular response to<br>interleukin-1                         | 6  | 0.001543 | SERPINE1, IRF1,<br>PYCARD, FAS, KLF2, FN1                                                | 7.10 |
| GO:0050728~<br>negative regulation<br>of inflammatory<br>response            | 6  | 0.001709 | TNFAIP6, TNFRSF1A,<br>SOCS3, NLRP3, ADA,<br>LGALS9                                       | 6.94 |
| GO:0007229~<br>integrin-mediated<br>signaling pathway                        | 6  | 0.00218  | ITGAL, ITGB2L, FERMT3,<br>ITGB7, ADAM8, ITGB1                                            | 6.57 |
| GO:0048661~<br>positive regulation<br>of smooth muscle<br>cell proliferation | 5  | 0.00781  | CYBA, HES5, HMOX1,<br>TGM2, HBEGF                                                        | 6.36 |
| GO:0034097~<br>response to cytokine                                          | 5  | 0.009247 | STAT6, CORO1A, IL6ST,<br>TIMP2, STAT3                                                    | 6.06 |
| GO:0030335~<br>positive regulation<br>of cell migration                      | 12 | 6.16E-06 | TNFAIP6, CORO1A, CCR1,<br>FERMT3, HBEGF, MMP14,<br>MCAM, ITGB1, CTSH,<br>CSF1R, F2R, FN1 | 5.90 |
| GO:0030036~ actin<br>cytoskeleton<br>organization                            | 8  | 5.39E-04 | CORO1A, PFN3, RAC2,<br>WASF2, FHL3, WIPF1,<br>CSRP1, RHOG                                | 5.65 |
| GO:0019221~<br>cytokine-mediated<br>signaling pathway                        | 8  | 5.85E-04 | STAT6, TNFRSF1A,<br>PTPN6, IL6ST, SOCS3,<br>CSF2RB, STAT3, CSF1R                         | 5.58 |
| GO:0045766~<br>positive regulation<br>of angiogenesis                        | 6  | 0.00694  | TNFRSF1A, CYBB, MMP9,<br>HMOX1, SERPINE1, CTSH                                           | 5.00 |
| GO:0032355~<br>response to estradiol                                         | 6  | 0.008455 | TXNIP, SOCS3, GRN,<br>ANXA1, DNMT1, STAT3                                                | 4.77 |

|                                                          |    |          |                                                                                                                            |      |
|----------------------------------------------------------|----|----------|----------------------------------------------------------------------------------------------------------------------------|------|
| GO:0006954~<br>inflammatory<br>response                  | 16 | 1.78E-06 | C5AR2, C4B, CCR1,<br>ANXA1, NLRP3,<br>TNFRSF1A, CYBA, CYBB,<br>ITGB2L, LTB4R2,<br>PYCARD, PARP4, FAS,<br>ADAM8, CSF1R, F2R | 4.66 |
| GO:0001525~<br>angiogenesis                              | 10 | 6.18E-04 | HMOX1, WASF2,<br>SERPINE1, HBEGF,<br>MYH9, ADAM8, MMP14,<br>MCAM, FN1, ANXA2                                               | 4.22 |
| GO:0006955~<br>immune response                           | 13 | 7.48E-05 | FYB, C7, TNFRSF1A,<br>ENPP1, CCR1, IRF8, FAS,<br>CTSS, H2-DMA, NFIL3,<br>FTH1, CD74, LCP2                                  | 4.13 |
| GO:0042127~<br>regulation of cell<br>proliferation       | 9  | 0.001779 | TXNIP, STAT6,<br>TNFRSF1A, GM4907,<br>SERPINE1, ANXA1,<br>DNMT1, CNN2, FAS                                                 | 4.03 |
| GO:0002376~<br>immune system<br>process                  | 15 | 2.34E-05 | MBL2, ANXA1, IFI30,<br>NLRP3, C1QC, LGALS9,<br>CD74, MARCO, CFP,<br>C1QB, PYCARD, IRF1,<br>INPP5D, H2-DMA, CSF1R           | 4.00 |
| GO:0007568~ aging                                        | 7  | 0.009475 | SOCS3, DNMT1, CTSC,<br>FAS, TIMP2, ADA, STAT3                                                                              | 3.87 |
| GO:0042493~<br>response to drug                          | 13 | 2.82E-04 | TXNIP, CYBA, CYBB,<br>SOCS3, MMP9, ANXA1,<br>NPPC, DNMT1, FAS,<br>TIMP2, ITGB1, ADA,<br>STAT3                              | 3.58 |
| GO:0007155~ cell<br>adhesion                             | 16 | 8.57E-05 | ITGAL, OLFM4, FERMT3,<br>MCAM, MYH9, ITGB1,<br>ADA, TNFAIP6, ITGB2L,<br>HES5, FAT4, ITGB7, CD22,<br>MFAP4, THBS2, FN1      | 3.35 |
| GO:0045087~<br>innate immune<br>response                 | 13 | 6.06E-04 | MARCO, CFP, MBL2,<br>CYBA, C1QB, CYBB, C4B,<br>ANXA1, IRF1, PYCARD,<br>NLRP3, C1QC, CSF1R                                  | 3.29 |
| GO:0010628~<br>positive regulation<br>of gene expression | 11 | 0.006141 | TNFRSF1A, ATF3, ACTA2,<br>SERPINE1, DNMT1,<br>CNN2, NFIL3, CTSH,<br>LGALS9, STAT3, FN1                                     | 2.79 |

|                                               |    |          |                                                                                                                   |      |
|-----------------------------------------------|----|----------|-------------------------------------------------------------------------------------------------------------------|------|
| GO:0006508~<br>proteolysis                    | 15 | 0.001648 | SCPEP1, LGMN, MMP9,<br>CTSA, TRY4, CTSS,<br>NAPSA, MMP14, CTSK,<br>PSMB7, ADAMTS8,<br>HTRA1, CTSC, ADAM8,<br>CTSH | 2.64 |
| GO:0055114~<br>oxidation-reduction<br>process | 15 | 0.006708 | ME1, STEAP4, GLUD1,<br>IFI30, MSRB2, FTH1,<br>RDH12, CYBA, DHRS3,<br>CYBB, TXNDC2, HMOX1,<br>CYP2B19, ERO1L, GLRX | 2.25 |

**Commonly regulated GO terms 2dpi (Figure 2B)**

| <b>GO Term</b>                                                                               | <b>Number of<br/>genes</b> | <b>p-value</b> | <b>Genes</b>                                                                                                                                                | <b>Fold<br/>Enrichment</b> |
|----------------------------------------------------------------------------------------------|----------------------------|----------------|-------------------------------------------------------------------------------------------------------------------------------------------------------------|----------------------------|
| GO:0000122~<br>negative regulation<br>of transcription from<br>RNA polymerase II<br>promoter | 16                         | 0.006556       | TXNIP, HCLS1, PPARG,<br>SPI1, JUNB, STAT6,<br>HHEX, ATF3, CRY2,<br>HES5, HSF1, JUN, IRF8,<br>DNMT1, CRY1, SCRT1                                             | 2.18                       |
| GO:0045944~<br>positive regulation<br>of transcription from<br>RNA polymerase II<br>promoter | 22                         | 9.05E-04       | KLF9, EGR4, MAFB,<br>HCLS1, PPARG, SPI1,<br>IGF2, NPAS4, NLRP3,<br>JUNB, STAT6, FOS,<br>HHEX, MEIS2, ATF3,<br>HSF1, HES5, JUN, IRF1,<br>TNIP2, FOXD1, TOP2A | 2.21                       |
| GO:0007155~ cell<br>adhesion                                                                 | 14                         | 0.001086       | ITGAE, FERMT3, MCAM,<br>ADA, IGSF11, LGALS3BP,<br>ITGB2L, HES5, FAT4,<br>PECAM1, CD22, CSF3R,<br>MFAP4, FN1                                                 | 2.91                       |
| GO:0042493~<br>response to drug                                                              | 11                         | 0.003742       | TXNIP, TYMS, FOS, LYN,<br>MMP9, JUN, NCKAP1L,<br>DNMT1, IGF2, JUNB, ADA                                                                                     | 3.00                       |



|                                                      |    |          |                                                                                                                                |      |
|------------------------------------------------------|----|----------|--------------------------------------------------------------------------------------------------------------------------------|------|
| GO:0006508~<br>proteolysis                           | 19 | 1.75E-05 | SCPEP1, USP8, CNDP2, MMP9, CTSA, GZMB, TRY4, CTSS, NAPS, MMP14, PSMB7, CTSK, PSMA6, TPP1, CTSC, LTA4H, ADAM8, CTSH, DPP7       | 3.31 |
| GO:0045087~<br>innate immune response                | 14 | 1.86E-04 | LYN, TLR13, NLRP3, C1QC, TLR8, MARCO, C1QA, CFP, C1QB, PYCARD, IRF1, FCER1G, MR1, CSF1R                                        | 3.51 |
| GO:0032496~<br>response to lipopolysaccharide        | 8  | 0.004674 | FOS, NLRC3, HSF1, JUN, DNMT1, JUNB, LGALS9, F2R                                                                                | 3.87 |
| GO:0006955~<br>immune response                       | 13 | 8.34E-05 | FYB, C7, ENPP1, CCR1, IRF8, H2-AB1, TNFSF12, CTSS, MR1, H2-DMA, FTH1, H2-DMB2, LCP2                                            | 4.09 |
| GO:0006954~<br>inflammatory response                 | 15 | 9.98E-06 | PIK3CG, C5AR2, LYN, CCR1, PPARG, TLR13, NLRP3, TLR8, ITGB2L, LTB4R2, PYCARD, TNIP2, ADAM8, CSF1R, F2R                          | 4.33 |
| GO:0030335~<br>positive regulation of cell migration | 10 | 2.21E-04 | CORO1A, LYN, CCR1, FERMT3, MMP14, MCAM, CTSH, CSF1R, F2R, FN1                                                                  | 4.87 |
| GO:0001525~<br>angiogenesis                          | 12 | 2.86E-05 | PIK3CG, JUN, HMOX1, PECAM1, TNFSF12, ADAM8, MMP14, MCAM, ARHGAP24, GJA5, FN1, ANXA2                                            | 5.01 |
| GO:0002376~<br>immune system process                 | 19 | 4.50E-08 | PIK3CG, LYN, TLR13, IFI30, H2-AB1, NLRP3, C1QC, LGALS9, TLR8, MARCO, CFP, C1QA, C1QB, PYCARD, IRF1, MR1, INPP5D, H2-DMA, CSF1R | 5.02 |

|                                                                      |   |          |                                                       |       |
|----------------------------------------------------------------------|---|----------|-------------------------------------------------------|-------|
| GO:0006979~<br>response to<br>oxidative stress                       | 7 | 0.001999 | TXNIP, GPX2, MMP9,<br>HMOX1, CYGB, GPX8,<br>MMP14     | 5.34  |
| GO:0007623~<br>circadian rhythm                                      | 6 | 0.005282 | TYMS, CRY2, CLDN4,<br>KLF9, JUN, CRY1                 | 5.35  |
| GO:0006935~<br>chemotaxis                                            | 7 | 0.001127 | PIK3CG, C5AR2, LYN,<br>RAC2, CCR1, NCKAP1L,<br>LGALS9 | 5.97  |
| GO:0007229~<br>integrin-mediated<br>signaling pathway                | 6 | 0.002289 | ITGB2L, PLEK, FERMT3,<br>ITGAE, FCER1G, ADAM8         | 6.50  |
| GO:0034097~<br>response to cytokine                                  | 6 | 0.00146  | STAT6, TYMS, FOS,<br>CORO1A, JUN, JUNB                | 7.19  |
| GO:0009612~<br>response to<br>mechanical stimulus                    | 6 | 5.23E-04 | TXNIP, MEIS2, JUN,<br>PPARG, MMP14, JUNB              | 9.02  |
| GO:0019882~<br>antigen processing<br>and presentation                | 5 | 0.001979 | H2-AB1, CTSS, MR1, H2-<br>DMA, H2-DMB2                | 9.33  |
| GO:0009314~<br>response to radiation                                 | 4 | 0.004913 | IL1R1, JUN, IGF2, JUNB                                | 11.51 |
| GO:0032570~<br>response to<br>progesterone                           | 5 | 6.36E-04 | TXNIP, TYMS, FOS,<br>CLDN4, JUNB                      | 12.59 |
| GO:0007249~ I-<br>kappaB kinase/NF-<br>kappaB signaling              | 4 | 0.003804 | NLRC3, IRF1, TNIP2, TLR8                              | 12.59 |
| GO:0048147~<br>negative regulation<br>of fibroblast<br>proliferation | 4 | 0.003804 | MMP9, IFI30, C1QL4,<br>FTH1                           | 12.59 |
| GO:0070527~<br>platelet aggregation                                  | 5 | 4.71E-04 | PTPN6, PLEK, FERMT3,<br>CSRP1, CLIC1                  | 13.61 |

|                                                                                       |   |          |                                                          |       |
|---------------------------------------------------------------------------------------|---|----------|----------------------------------------------------------|-------|
| GO:0051603~<br>proteolysis involved<br>in cellular protein<br>catabolic process       | 8 | 1.60E-06 | SCPEP1, CTSK, PSMB7,<br>PSMA6, CTSA, CTSC,<br>CTSS, CTSH | 13.89 |
| GO:0035987~<br>endodermal cell<br>differentiation                                     | 4 | 0.002586 | ITGB2L, MMP9, MMP14,<br>FN1                              | 14.39 |
| GO:0045453~ bone<br>resorption                                                        | 4 | 0.001856 | CTSK, RAC2, TPP1, CTSS                                   | 16.11 |
| GO:0030574~<br>collagen catabolic<br>process                                          | 4 | 0.001645 | CTSK, MMP9, CTSS,<br>MMP14                               | 16.79 |
| GO:0030833~<br>regulation of actin<br>filament<br>polymerization                      | 4 | 0.001645 | ARPC1B, CORO1A, PFN3,<br>HCLS1                           | 16.79 |
| GO:0051279~<br>regulation of release<br>of sequestered<br>calcium ion into<br>cytosol | 3 | 0.008161 | PTPN6, CORO1A, LYN                                       | 21.58 |

|                                                                                               |   |          |                                        |       |
|-----------------------------------------------------------------------------------------------|---|----------|----------------------------------------|-------|
| GO:0001913~ T cell mediated cytotoxicity                                                      | 3 | 0.007041 | GZMB, CTSC, CTSH                       | 23.24 |
| GO:0045576~ mast cell activation                                                              | 3 | 0.007041 | FYB, FCER1G, LCP2                      | 23.24 |
| GO:0097067~ cellular response to thyroid hormone stimulus                                     | 3 | 0.007041 | KLF9, CTSS, CTSH                       | 23.24 |
| GO:0019886~ antigen processing and presentation of exogenous peptide antigen via MHC class II | 5 | 8.52E-06 | IFI30, FCER1G, H2-AB1, H2-DMA, H2-DMB2 | 35.97 |
| GO:0032611~ interleukin-1 beta production                                                     | 3 | 0.001971 | PYCARD, MR1, NLRP3                     | 43.16 |

**Commonly regulated GO terms 3dpi (Figure 2B)**

| <b>GO Term</b> | <b>Number of genes</b> | <b>p-value</b> | <b>Genes</b> | <b>Fold Enrichment</b> |
|----------------|------------------------|----------------|--------------|------------------------|
|----------------|------------------------|----------------|--------------|------------------------|

|                                                                                                                         |   |          |                                                                                                           |       |
|-------------------------------------------------------------------------------------------------------------------------|---|----------|-----------------------------------------------------------------------------------------------------------|-------|
| GO:0019886~<br>antigen processing<br>and presentation of<br>exogenous peptide<br>antigen via MHC<br>class II            | 6 | 2.05E-08 | H2-EB1, IFI30, H2-AB1,<br>H2-DMA, CD74, H2-DMB2                                                           | 65.29 |
| GO:0002504~<br>antigen processing<br>and presentation of<br>peptide or<br>polysaccharide<br>antigen via MHC<br>class II | 3 | 0.001468 | H2-EB1, IFI30, H2-AB1,<br>H2-DMA, CD74, H2-DMB2                                                           | 65.29 |
| GO:0051085~<br>chaperone mediated<br>protein folding<br>requiring cofactor                                              | 3 | 0.003127 | MARCO, CFP, C1QB, LYN,<br>H2-EB1, IFI30, H2-AB1,<br>INPP5D, H2-DMA, C1QC,<br>CD74, TLR8, LGALS9,<br>CSF1R | 5.60  |
| GO:0051279~<br>regulation of release<br>of sequestered<br>calcium ion into<br>cytosol                                   | 3 | 0.003633 | H2-EB1, H2-AB1, CTSS,<br>H2-DMA, CD74, H2-DMB2                                                            | 16.93 |
| GO:0045579~<br>positive regulation<br>of B cell<br>differentiation                                                      | 3 | 0.00536  | MMP9, IFI30, C1QL4,<br>FTH1, LTA                                                                          | 23.80 |
| GO:0030574~<br>collagen catabolic<br>process                                                                            | 4 | 4.92E-04 | PTPN6, LYN, LCK,<br>NCKAP1L, IGKC                                                                         | 13.85 |
| GO:0048147~<br>negative regulation<br>of fibroblast<br>proliferation                                                    | 5 | 5.33E-05 | CTSK, MMP9, CTSS,<br>MMP14                                                                                | 25.39 |
| GO:0035987~<br>endodermal cell<br>differentiation                                                                       | 4 | 7.82E-04 | ITGB2L, MMP9, MMP14,<br>FN1                                                                               | 21.76 |
| GO:0033189~<br>response to vitamin<br>A                                                                                 | 3 | 0.008913 | HMOX1, PECAM1,<br>TNFSF12, MMP14, MCAM,<br>GJA5, FN1, ANXA2                                               | 5.06  |
| GO:0045089~<br>positive regulation<br>of innate immune<br>response                                                      | 3 | 0.008913 | H2-EB1, H2-AB1, H2-DMA                                                                                    | 50.78 |

|                                                                                 |    |          |                                                                 |       |
|---------------------------------------------------------------------------------|----|----------|-----------------------------------------------------------------|-------|
| GO:0016064~<br>immunoglobulin<br>mediated immune<br>response                    | 3  | 0.009721 | ITGB2L, LYN, CCR1,<br>PPARG, LTB4R2, TNIP2,<br>TLR8, LTA, CSF1R | 3.93  |
| GO:0019882~<br>antigen processing<br>and presentation                           | 6  | 2.63E-05 | CORO1A, LYN, CCR1,<br>MMP14, MCAM, CSF1R,<br>FN1                | 5.15  |
| GO:0050853~ B cell<br>receptor signaling<br>pathway                             | 5  | 4.50E-04 | H2-DMA, CD74, H2-DMB2                                           | 35.15 |
| GO:0006909~<br>phagocytosis                                                     | 4  | 0.004711 | HHEX, PTPN6, PIM1,<br>TACC3, CD74, LTA,<br>CSF1R                | 4.74  |
| GO:0051603~<br>proteolysis involved<br>in cellular protein<br>catabolic process | 4  | 0.006395 | PTPN6, CORO1A, LYN                                              | 32.64 |
| GO:0006898~<br>receptor-mediated<br>endocytosis                                 | 4  | 0.007026 | CORO1A, PECAM1, IRF8,<br>ANXA3                                  | 11.72 |
| GO:0018108~<br>peptidyl-tyrosine<br>phosphorylation                             | 4  | 0.00876  | MARCO, CFP, C1QB, LYN,<br>LCK, IGKC, C1QC, TLR8,<br>CSF1R       | 3.41  |
| GO:0009612~<br>response to<br>mechanical stimulus                               | 4  | 0.009518 | NCKAP1L, INPP5D,<br>MMP14                                       | 26.88 |
| GO:0006955~<br>immune response                                                  | 16 | 2.55E-09 | SCPEP1, CTSK, CTSC,<br>CTSS                                     | 10.51 |
| GO:0006935~<br>chemotaxis                                                       | 5  | 0.007408 | MARCO, MRC1, TFRC,<br>FTH1                                      | 10.16 |
| GO:0002376~<br>immune system<br>process                                         | 14 | 1.21E-06 | LYN, CCR1, NCKAP1L,<br>LECT2, LGALS9                            | 6.45  |
| GO:0030335~<br>positive regulation<br>of cell migration                         | 7  | 0.002354 | PTPN6, LYN, LCK, CSF1R                                          | 9.37  |
| GO:0001525~<br>angiogenesis                                                     | 8  | 0.001015 | TYMS, PPARG, DNMT1                                              | 20.77 |
| GO:0008283~ cell<br>proliferation                                               | 7  | 0.003555 | TLR8, CD74, LGALS9                                              | 20.77 |
| GO:0006954~<br>inflammatory<br>response                                         | 9  | 0.002032 | LCK, PPARG, MMP14,<br>SMPD2                                     | 9.09  |
| GO:0045087~<br>innate immune<br>response                                        | 9  | 0.004796 | INPP5D, H2-DMA, CD74                                            | 19.87 |

**Commonly regulated GO terms 7dpi (Figure 2B)**

| <b>GO Term</b>                                                                  | <b>Number of genes</b> | <b>p-value</b> | <b>Genes</b>                                                | <b>Fold Enrichment</b> |
|---------------------------------------------------------------------------------|------------------------|----------------|-------------------------------------------------------------|------------------------|
| GO:2000323~<br>negative regulation of glucocorticoid receptor signaling pathway | 4                      | 1.27E-05       | CRY2, PER1, ARNTL, CRY1                                     | 76.01                  |
| GO:0061469~<br>regulation of type B pancreatic cell proliferation               | 4                      | 2.22E-05       | NR1D1, NR4A1, NR4A3, ERRFI1                                 | 65.15                  |
| GO:0042754~<br>negative regulation of circadian rhythm                          | 3                      | 0.002042       | CIPC, CRY2, CRY1                                            | 42.75                  |
| GO:0000188~<br>inactivation of MAPK activity                                    | 4                      | 2.74E-04       | DUSP4, DUSP1, DUSP16, DUSP8                                 | 30.40                  |
| GO:0001706~<br>endoderm formation                                               | 4                      | 3.35E-04       | DUSP5, DUSP4, DUSP2, DUSP1                                  | 28.50                  |
| GO:0035970~<br>peptidyl-threonine dephosphorylation                             | 3                      | 0.004704       | DUSP5, DUSP4, DUSP1                                         | 28.50                  |
| GO:0043153~<br>entrainment of circadian clock by photoperiod                    | 5                      | 2.96E-05       | RBM4B, CRY2, PER1, CRY1, SIK1                               | 27.15                  |
| GO:0009416~<br>response to light stimulus                                       | 6                      | 4.73E-06       | FOS, FECH, DUSP1, JUND, PER1, JUNB                          | 23.59                  |
| GO:0016126~<br>sterol biosynthetic process                                      | 4                      | 0.001458       | EBP, MSMO1, HMGCR, NSDHL                                    | 17.54                  |
| GO:0050772~<br>positive regulation of axonogenesis                              | 4                      | 0.001458       | METRNL, NIN, PLXNB1, PLXNB2                                 | 17.54                  |
| GO:0032922~<br>circadian regulation of gene expression                          | 9                      | 6.32E-08       | RBM4B, RAI1, CRY2, NR1D1, CIART, PER1, ARNTL, BHLHE41, CRY1 | 16.55                  |

|                                                                  |    |          |                                                                                       |       |
|------------------------------------------------------------------|----|----------|---------------------------------------------------------------------------------------|-------|
| GO:0032870~<br>cellular response to<br>hormone stimulus          | 7  | 5.19E-06 | FOS, DUSP1, JUN, JUND,<br>FOSB, SIK1, JUNB                                            | 15.65 |
| GO:0035914~<br>skeletal muscle cell<br>differentiation           | 7  | 9.03E-06 | EGR1, FOS, EGR2, ATF3,<br>BTG2, DMRTA2, NR4A1                                         | 14.25 |
| GO:0032570~<br>response to<br>progesterone                       | 5  | 3.98E-04 | FOS, CLDN4, SOCS3,<br>FOSB, JUNB                                                      | 14.25 |
| GO:0006695~<br>cholesterol<br>biosynthetic process               | 4  | 0.002677 | EBP, HMGCR, IDI2,<br>NSDHL                                                            | 14.25 |
| GO:0071310~<br>cellular response to<br>organic substance         | 4  | 0.002926 | EGR1, EGR2, BCL2,<br>NR4A1                                                            | 13.82 |
| GO:0051591~<br>response to cAMP                                  | 7  | 1.23E-05 | FOS, DUSP1, JUN, JUND,<br>PER1, FOSB, JUNB                                            | 13.53 |
| GO:0009314~<br>response to radiation                             | 4  | 0.003465 | PLK3, JUN, JUND, JUNB                                                                 | 13.03 |
| GO:0071549~<br>cellular response to<br>dexamethasone<br>stimulus | 4  | 0.004062 | FECH, EIF4E, H2-AB1,<br>ERRF1                                                         | 12.33 |
| GO:0007623~<br>circadian rhythm                                  | 11 | 5.47E-08 | RBM4B, CRY2, NR1D1,<br>CLDN4, DBP, JUN, JUND,<br>PER1, ARNTL, BHLHE41,<br>CRY1        | 11.10 |
| GO:0042752~<br>regulation of<br>circadian rhythm                 | 5  | 0.001086 | CRY2, NR1D1, NR1D2,<br>PER1, CRY1                                                     | 10.96 |
| GO:0071277~<br>cellular response to<br>calcium ion               | 5  | 0.001167 | FOS, JUN, JUND, FOSB,<br>JUNB                                                         | 10.76 |
| GO:0048511~<br>rhythmic process                                  | 12 | 1.57E-08 | CIPC, RAI1, CRY2,<br>NR1D1, NR1D2, DBP,<br>CIART, PER1, ARNTL,<br>BHLHE41, CRY1, SIK1 | 10.69 |
| GO:0009612~<br>response to<br>mechanical stimulus                | 6  | 2.95E-04 | MEIS2, BTG2, JUN, JUND,<br>FOSB, JUNB                                                 | 10.21 |
| GO:0045597~<br>positive regulation<br>of cell<br>differentiation | 4  | 0.007496 | SOCS3, JUN, PPP1R13L,<br>JUNB                                                         | 9.91  |
| GO:0032868~<br>response to insulin                               | 6  | 4.13E-04 | EGR1, RBP4, EGR2, CRY2,<br>SOCS3, CRY1                                                | 9.50  |



|                                                                                              |    |          |                                                                                                                                                         |      |
|----------------------------------------------------------------------------------------------|----|----------|---------------------------------------------------------------------------------------------------------------------------------------------------------|------|
| GO:0006694~<br>steroid biosynthetic<br>process                                               | 5  | 0.002093 | EBP, MSMO1, HMGCR,<br>PBX1, NSDHL                                                                                                                       | 9.19 |
| GO:0051726~<br>regulation of cell<br>cycle                                                   | 9  | 7.02E-06 | JUN, BCL2, JUND, RGCC,<br>NPM1, ARNTL, CCNG1,<br>GADD45B, JUNB                                                                                          | 9.00 |
| GO:0048661~<br>positive regulation<br>of smooth muscle<br>cell proliferation                 | 5  | 0.005258 | EGR1, HES5, HMGCR,<br>JUN, NR4A3                                                                                                                        | 7.13 |
| GO:0034097~<br>response to cytokine                                                          | 5  | 0.006246 | FOS, JUN, BCL2, JUND,<br>JUNB                                                                                                                           | 6.79 |
| GO:0007565~<br>female pregnancy                                                              | 5  | 0.007644 | FOS, CLDN4, FOSB, JUNB,<br>LGALS9                                                                                                                       | 6.41 |
| GO:0016311~<br>dephosphorylation                                                             | 6  | 0.002559 | DUSP5, DUSP4, DUSP2,<br>DUSP1, DUSP16, DUSP8                                                                                                            | 6.33 |
| GO:0051384~<br>response to<br>glucocorticoid                                                 | 5  | 0.008575 | KRAS, PTGDS, DUSP1,<br>SOCS3, BCL2                                                                                                                      | 6.20 |
| GO:0006366~<br>transcription from<br>RNA polymerase II<br>promoter                           | 7  | 0.001485 | EGR1, FOS, EGR2, JUN,<br>JUND, FOSB, JUNB                                                                                                               | 5.66 |
| GO:0030182 neuron<br>differentiation                                                         | 6  | 0.005827 | IER2, HES5, BTG2, EMX2,<br>GFRA1, SMARCA1                                                                                                               | 5.22 |
| GO:0006470~<br>protein<br>dephosphorylation                                                  | 6  | 0.007232 | DUSP4, DUSP2, DUSP1,<br>PPM1K, BCL2, DUSP8                                                                                                              | 4.96 |
| GO:0043524~<br>negative regulation<br>of neuron apoptotic<br>process                         | 7  | 0.003077 | FAM134B, KRAS, BTG2,<br>JUN, BCL2, NPM1, NR4A3                                                                                                          | 4.90 |
| GO:0032496~<br>response to<br>lipopolysaccharide                                             | 7  | 0.009811 | FOS, SOCS3, JUN, JUND,<br>GNG12, JUNB, LGALS9                                                                                                           | 3.84 |
| GO:0000122~<br>negative regulation<br>of transcription from<br>RNA polymerase II<br>promoter | 20 | 2.38E-05 | EGR1, HIST1H1C, EZH1,<br>NR4A3, PPP1R13L, JUNB,<br>PLK3, ATF3, CRY2,<br>NR1D1, BTG2, HES5, JUN,<br>JUND, PER1, BHLHE41,<br>SCRT1, SIK1, CRY1,<br>DNAJB5 | 3.09 |
| GO:0042493~<br>response to drug                                                              | 10 | 0.005132 | FOS, FECH, SOCS3, JUN,<br>BCL2, JUND, EMX2,<br>FOSB, AK4, JUNB                                                                                          | 3.09 |

|                                                                                              |    |          |                                                                                                                                                               |      |
|----------------------------------------------------------------------------------------------|----|----------|---------------------------------------------------------------------------------------------------------------------------------------------------------------|------|
| GO:0006357~<br>regulation of<br>transcription from<br>RNA polymerase II<br>promoter          | 10 | 0.008526 | FOS, RAI1, ZFP395, ATF3,<br>HIST1H1C, DBP, JUND,<br>LDB2, FOSB, JUNB                                                                                          | 2.85 |
| GO:0043066~<br>negative regulation<br>of apoptotic process                                   | 14 | 0.00146  | EGR3, HMGCR, SOCS3,<br>BNIP3, NR4A3, CCNG1,<br>PDCD4, PLK3, PLK2,<br>BTG2, DUSP1, JUN, BCL2,<br>NPM1                                                          | 2.81 |
| GO:0045893~<br>positive regulation<br>of transcription,<br>DNA-templated                     | 14 | 0.001756 | EGR1, FOS, RAI1, EGR2,<br>NR1D1, HES5, NR1D2,<br>JUN, NPM1, NR4A1,<br>NR4A3, NPAS4, ARNTL,<br>SMARCA1                                                         | 2.75 |
| GO:0045892~<br>negative regulation<br>of transcription,<br>DNA-templated                     | 14 | 0.001893 | DUSP5, CIPC, CRY2,<br>ATF3, NR1D1, HES5,<br>NR1D2, JUN, CIART,<br>PER1, ARNTL, BHLHE41,<br>CRY1, PDCD4                                                        | 2.72 |
| GO:0045944~<br>positive regulation<br>of transcription from<br>RNA polymerase II<br>promoter | 23 | 5.81E-05 | EGR1, RAI1, EGR2,<br>CCPG1, EGR4, EZH1,<br>NR4A1, LDB2, FOSB,<br>ARNTL, NPAS4, NR4A3,<br>JUNB, FOS, ATF3, MEIS2,<br>HES5, DBP, JUN, JUND,<br>RGCC, PER1, PBX1 | 2.62 |

**Exclusively regulated GO terms in nostril 1dpi (Figure 2B)**

| <b>GO Term</b>                                                          | <b>Number of<br/>genes</b> | <b>p-value</b> | <b>Genes</b>                | <b>Fold<br/>Enrichment</b> |
|-------------------------------------------------------------------------|----------------------------|----------------|-----------------------------|----------------------------|
| GO:0031953~<br>negative regulation<br>of protein<br>autophosphorylation | 4                          | 1.65E-<br>04   | JUN, NLRP12, ERFFI1,<br>MVP | 35.25                      |

|                                                                                                                 |    |              |                                                                                                                                        |       |
|-----------------------------------------------------------------------------------------------------------------|----|--------------|----------------------------------------------------------------------------------------------------------------------------------------|-------|
| GO:0030195~<br>negative regulation<br>of blood coagulation                                                      | 3  | 0.00758<br>2 | THBD, APOH, ANXA5                                                                                                                      | 22.37 |
| GO:0016338~<br>calcium-<br>independent cell-cell<br>adhesion via plasma<br>membrane cell-<br>adhesion molecules | 4  | 0.00183<br>5 | CLDN7, CLDN4, ESAM,<br>CLDN11                                                                                                          | 16.15 |
| GO:0008652~<br>cellular amino acid<br>biosynthetic process                                                      | 4  | 0.00207      | ADI1, MTHFD1, CTH,<br>ASS1                                                                                                             | 15.51 |
| GO:0032570~<br>response to<br>progesterone                                                                      | 4  | 0.00794<br>7 | CLDN4, C3, FOSL1,<br>TGFB1                                                                                                             | 9.69  |
| GO:0042130~<br>negative regulation<br>of T cell<br>proliferation                                                | 4  | 0.00794<br>7 | MAD1L1, CEBPB, SDC4,<br>TGFB1                                                                                                          | 9.69  |
| GO:0007596~ blood<br>coagulation                                                                                | 6  | 0.00172<br>8 | THBD, FGA, C3, APOH,<br>TFPI, ANXA5                                                                                                    | 6.92  |
| GO:0042127~<br>regulation of cell<br>proliferation                                                              | 8  | 0.00909      | SAT1, TNFRSF9,<br>PLA2G4A, SGK1, PRG4,<br>EGLN3, NDRG1, TGFB1                                                                          | 3.41  |
| GO:0055114~<br>oxidation-reduction<br>process                                                                   | 17 | 0.00168<br>6 | EGLN3, DHRSX, PRDX1,<br>PIPOX, MTHFD1L,<br>GLDC, FMO4, MTHFD1,<br>ADI1, RDH10, CYP27B1,<br>DIO2, MARC2, CH25H,<br>HSD17B3, LOXL1, BCO2 | 2.43  |

**Exclusively regulated GO terms in nostril 2dpi (Figure 2B)**

| <b>GO Term</b>                                             | <b>Number of genes</b> | <b>p-value</b> | <b>Genes</b>                      | <b>Fold Enrichment</b> |
|------------------------------------------------------------|------------------------|----------------|-----------------------------------|------------------------|
| GO:0030048~ actin filament-based movement                  | 3                      | 0.00676        | ACTC1, WASF2, MYH6                | 23.87                  |
| GO:0048873~ homeostasis of number of cells within a tissue | 4                      | 0.0025         | GATA1, P2RX7, TEX15, KRAS         | 14.62                  |
| GO:0050766~positive regulation of phagocytosis             | 4                      | 0.005248       | MBL2, CYBA, PTK2, HSPA8           | 11.27                  |
| GO:0000187~ activation of MAPK activity                    | 5                      | 0.002251       | P2RX7, ARRB1, EFNA1, TGFB3, PDE6G | 9.01                   |
| GO:0007565~ female pregnancy                               | 5                      | 0.004179       | OXT, TGFB3, CRH, HSD11B2, FOSL1   | 7.60                   |
| GO:0030324~ lung development                               | 6                      | 0.002453       | CEBPA, RBP4, ARG1, GPC3, CRH, CP  | 6.39                   |

|                                                          |    |              |                                                                                  |      |
|----------------------------------------------------------|----|--------------|----------------------------------------------------------------------------------|------|
| GO:0010628~<br>positive regulation<br>of gene expression | 11 | 7.56E-<br>04 | RBM4B, ACTC1, WNT16,<br>P2RX7, KRAS, TGFB3,<br>CRH, IL2RG, ETV4,<br>HSPA8, STAT3 | 3.71 |
| GO:0042493~<br>response to drug                          | 10 | 0.00161<br>8 | ARG1, CYBA, ACTC1,<br>P2RX7, NPPC, CRH,<br>HSD11B2, FOSL1,<br>DDIT3, STAT3       | 3.66 |

**Exclusively regulated GO terms in nostril 3dpi (Figure 2B)**

| <b>GO Term</b>                                          | <b>Number of<br/>genes</b> | <b>p-value</b> | <b>Genes</b>                                                                        | <b>Fold<br/>Enrichment</b> |
|---------------------------------------------------------|----------------------------|----------------|-------------------------------------------------------------------------------------|----------------------------|
| GO:0030199~<br>collagen fibril<br>organization          | 3                          | 0.00810<br>8   | P4HA1, FOXC1,<br>SERPINH1                                                           | 21.78                      |
| GO:0042127~<br>regulation of cell<br>proliferation      | 5                          | 0.00801<br>1   | STAT6, GM4907, CD81,<br>EGLN3, NDRG1                                                | 6.23                       |
| GO:0007275~<br>multicellular<br>organism<br>development | 11                         | 0.00284<br>7   | MSX3, DKK3, APLNR,<br>BMP1, POGK, STK36,<br>ACKR3, TMEM100,<br>DNASE2A, PAQR5, FZD6 | 3.010                      |

**Exclusively regulated GO terms in nostril 7dpi (Figure 2B)**

| <b>GO Term</b>                                                                                                                   | <b>Number of genes</b> | <b>p-value</b> | <b>Genes</b>                                                                           | <b>Fold Enrichment</b> |
|----------------------------------------------------------------------------------------------------------------------------------|------------------------|----------------|----------------------------------------------------------------------------------------|------------------------|
| GO:1900153~<br>positive regulation<br>of nuclear-<br>transcribed mRNA<br>catabolic process,<br>deadenylation-<br>dependent decay | 3                      | 0.00606<br>6   | ZFP36L1, CNOT7, TOB1                                                                   | 25.17                  |
| GO:0055085~<br>transmembrane<br>transport                                                                                        | 9                      | 0.00820<br>9   | SLC25A4, SLC16A6,<br>KCNA2, SLC22A7,<br>SLC2A1, SLC41A1,<br>ABCC1, SLC13A4,<br>SLC26A2 | 3.12                   |

**Exclusively regulated GO terms in Skull 1dpi (Figure 2B)**

| <b>GO Term</b>                                                                                         | <b>Number of genes</b> | <b>p-value</b> | <b>Genes</b>     | <b>Fold Enrichment</b> |
|--------------------------------------------------------------------------------------------------------|------------------------|----------------|------------------|------------------------|
| GO:0018298~<br>protein-<br>chromophore<br>linkage                                                      | 3                      | 0.00429<br>1   | CRY2, CRY1, RHO  | 29.78                  |
| GO:0045744~<br>negative regulation<br>of G-protein<br>coupled receptor<br>protein signaling<br>pathway | 3                      | 0.00601<br>3   | RGS2, PLEK, CRY1 | 25.20                  |

|                                                                   |   |              |                                                 |       |
|-------------------------------------------------------------------|---|--------------|-------------------------------------------------|-------|
| GO:0030218~<br>erythrocyte<br>differentiation                     | 6 | 7.34E-<br>05 | GATA1, ALAS2, LYN,<br>HCLS1, KLF1, DNASE2A      | 13.65 |
| GO:0030593~<br>neutrophil<br>chemotaxis                           | 6 | 5.03E-<br>04 | VAV3, PREX1,<br>NCKAP1L, CSF3R,<br>FCER1G, VAV1 | 9.10  |
| GO:0009612~<br>response to<br>mechanical stimulus                 | 5 | 0.00324<br>9 | MEIS2, PPARG, STAT1,<br>EIF2AK2, JUNB           | 8.14  |
| GO:0071407~<br>cellular response to<br>organic cyclic<br>compound | 5 | 0.00510<br>6 | PAK2, HSF1, CYP1A1,<br>PPARG, STAT1             | 7.18  |
| GO:0009615~<br>response to virus                                  | 5 | 0.00756<br>7 | CYP1A1, PIM2, EIF2AK2,<br>MX1, TLR8             | 6.42  |
| GO:0007565~<br>female pregnancy                                   | 5 | 0.00887<br>4 | SLC38A3, A2M, RXRA,<br>CR1L, JUNB               | 6.13  |
| GO:0007623~<br>circadian rhythm                                   | 6 | 0.00374<br>6 | CRY2, MAT2A, RORB,<br>RPE65, PER3, CRY1         | 5.79  |
| GO:0048511~<br>rhythmic process                                   | 6 | 0.00633<br>5 | CRY2, PPARG, CIART,<br>RORB, PER3, CRY1         | 5.11  |

|                                                                                  |    |          |                                                                                                        |      |
|----------------------------------------------------------------------------------|----|----------|--------------------------------------------------------------------------------------------------------|------|
| GO:0001701~ in utero embryonic development                                       | 12 | 9.22E-05 | GATA1, ASCL2, HHEX, ACVRL1, HSF1, RXRA, TIE1, MYH6, KLF1, UBE2B, CR1L, JUNB                            | 4.39 |
| GO:0008285~ negative regulation of cell proliferation                            | 13 | 2.33E-04 | ACVRL1, LYN, TRPV2, RXRA, PPARG, PIM2, SKAP2, FRZB, GATA1, GPC3, HSF1, SCIN, EIF2AK2                   | 3.65 |
| GO:0002376~ immune system process                                                | 12 | 7.51E-04 | PIK3CG, C1QA, LYN, MAP3K8, H2-AB1, EIF2AK2, TAPBPL, MX1, CR1L, TLR8, BTK, PSMB9                        | 3.43 |
| GO:0006915~ apoptotic process                                                    | 13 | 0.006112 | 1810011O10RIK, TRPV2, PIM3, GZMB, PIM2, BCL2L13, STAT1, DNASE2A, BTK, PAK2, GADD45G, MAP3K8, GAPDH     | 2.48 |
| GO:0000122~ negative regulation of transcription from RNA polymerase II promoter | 16 | 0.003082 | KLF5, BACH1, HCLS1, RXRA, PPARG, STAT1, JUNB, ASCL2, SUZ12, GATA1, HHEX, IFI27, CRY2, HSF1, PER3, CRY1 | 2.36 |

**Exclusively regulated GO terms in Skull 2dpi (Figure 2B)**

| GO Term                                           | Number of genes | p-value  | Genes                                  | Fold Enrichment |
|---------------------------------------------------|-----------------|----------|----------------------------------------|-----------------|
| GO:0030335~ positive regulation of cell migration | 5               | 0.009733 | COL18A1, TNFAIP6, SYNE2, MYADM, PIK3R1 | 5.91            |



**Exclusively regulated GO terms in Skull 3dpi (Figure 2B)**

| <b>GO Term</b>                                                                                               | <b>Number of genes</b> | <b>p-value</b> | <b>Genes</b>                                                                 | <b>Fold Enrichment</b> |
|--------------------------------------------------------------------------------------------------------------|------------------------|----------------|------------------------------------------------------------------------------|------------------------|
| GO:0042512~<br>negative regulation<br>of tyrosine<br>phosphorylation of<br>Stat1 protein                     | 3                      | 0.00355<br>3   | SOCS3, SOCS1, IRF1                                                           | 30.21                  |
| GO:0019885~<br>antigen processing<br>and presentation of<br>endogenous peptide<br>antigen via MHC<br>class I | 3                      | 0.00582<br>5   | TAP2, ERAP1, TAPBP                                                           | 24.17                  |
| GO:0042518~<br>negative regulation<br>of tyrosine<br>phosphorylation of<br>Stat3 protein                     | 3                      | 0.00859<br>5   | SUZ12, SOCS3, SOCS1                                                          | 20.14                  |
| GO:0016126~ sterol<br>biosynthetic process                                                                   | 9                      | 1.41E-<br>07   | EBP, SC5D, MSMO1,<br>HMGCR, CH25H, INSIG1,<br>HMGCS1, NSDHL,<br>FDFT1        | 13.94                  |
| GO:0045088~<br>regulation of innate<br>immune response                                                       | 4                      | 0.00281<br>1   | IRF7, IRF1, MYO1F,<br>DHX58                                                  | 13.43                  |
| GO:0006695~<br>cholesterol<br>biosynthetic process                                                           | 10                     | 5.48E-<br>08   | EBP, APOA1, HMGCR,<br>INSIG1, HMGCS1, LSS,<br>IDI2, HSD17B7, NSDHL,<br>FDFT1 | 12.59                  |

|                                                                                                                                |    |              |                                                                                                        |      |
|--------------------------------------------------------------------------------------------------------------------------------|----|--------------|--------------------------------------------------------------------------------------------------------|------|
| GO:0008299~<br>isoprenoid<br>biosynthetic process                                                                              | 4  | 0.00792<br>5 | HMGCR, HMGCS1, IDI2,<br>FDFT1                                                                          | 9.48 |
| GO:0006694~<br>steroid biosynthetic<br>process                                                                                 | 13 | 3.24E-<br>08 | EBP, SC5D, MSMO1,<br>HMGCR, HSD17B12,<br>HMGCS1, LSS, FDFT1,<br>CH25H, PBX1, SRD5A1,<br>HSD17B7, NSDHL | 8.45 |
| GO:0071345~<br>cellular response to<br>cytokine stimulus                                                                       | 6  | 0.00140<br>2 | CXCR4, HCLS1, SOCS1,<br>NLRP12, NFKBIA,<br>STAT1                                                       | 7.11 |
| GO:0043124~<br>negative regulation<br>of I-kappaB<br>kinase/NF-kappaB<br>signaling                                             | 7  | 4.20E-<br>04 | OLFM4, NLRC3,<br>NLRP12, PYCARD,<br>OPTN, STAT1, TANK                                                  | 7.05 |
| GO:0008202~<br>steroid metabolic<br>process                                                                                    | 13 | 1.04E-<br>06 | EBP, SC5D, MSMO1,<br>APOA1, HMGCR,<br>CH25H, APOF, SLC37A4,<br>INSIG1, HMGCS1,<br>SRD5A1, NSDHL, FDFT1 | 6.23 |
| GO:0002479~<br>antigen processing<br>and presentation of<br>exogenous peptide<br>antigen via MHC<br>class I, TAP-<br>dependent | 5  | 0.00860<br>8 | PSMB7, PSMA6, PSMB8,<br>TAPBP, PSMB9                                                                   | 6.10 |
| GO:0009617~<br>response to<br>bacterium                                                                                        | 5  | 0.00956<br>9 | BAIAP2L1, NCF1,<br>PYCARD, STAT1, FUCA2                                                                | 5.92 |

|                                                          |    |          |                                                                     |      |
|----------------------------------------------------------|----|----------|---------------------------------------------------------------------|------|
| GO:0006633~ fatty acid biosynthetic process              | 9  | 3.61E-04 | ELOVL1, SC5D, MSMO1, PTGDS, CH25H, HSD17B12, ELOVL2, FADS3, SCD4    | 5.11 |
| GO:0008203~ cholesterol metabolic process                | 10 | 3.57E-04 | EBP, APOA1, HMGCR, APOF, CH25H, INSIG1, HMGCS1, ABCA2, NSDHL, FDFT1 | 4.53 |
| GO:0050728~ negative regulation of inflammatory response | 9  | 0.001516 | ZFP36, ABR, APOA1, SHARPIN, SOCS3, NLRP12, ACP5, NLRP3, ADA         | 4.12 |
| GO:0031100~ organ regeneration                           | 7  | 0.007186 | PKM, NRF1, APOA1, SOCS3, EIF4A1, SOCS1, CCNA2                       | 4.09 |
| GO:0007565~ female pregnancy                             | 9  | 0.00163  | FOS, SLC38A3, OXT, CRH, HSD11B2, IGF2, IGFBP2, JUNB, EPN1           | 4.07 |
| GO:0032868~ response to insulin                          | 7  | 0.008806 | RBP4, SLC27A1, GRB10, SOCS3, HSD11B2, OGT, PCK1                     | 3.92 |
| GO:0009615~ response to virus                            | 8  | 0.005122 | HYAL2, TLR13, RSAD2, EIF2AK2, MX1, MX2, DHX58, CXCL10               | 3.79 |
| GO:0051384~ response to glucocorticoid                   | 8  | 0.007852 | PTGDS, SOCS3, OXT, MSTN, HSD11B2, FAS, IGFBP2, CDO1                 | 3.50 |

|                                                  |    |              |                                                                                                                                                                                                                                                   |      |
|--------------------------------------------------|----|--------------|---------------------------------------------------------------------------------------------------------------------------------------------------------------------------------------------------------------------------------------------------|------|
| GO:0051607~<br>defense response to<br>virus      | 14 | 2.90E-<br>04 | PTPRC, HYAL2, RSAD2,<br>TRIM25, IFIT3B, NLRP3,<br>CXCL10, ISG15,<br>PYCARD, IRF1,<br>EIF2AK2, MX1, MX2,<br>DHX58                                                                                                                                  | 3.36 |
| GO:0016311~<br>dephosphorylation                 | 9  | 0.00541<br>9 | DUSP5, PNKP, MTMR3,<br>PTPRC, DUSP3, PTPRG,<br>DUSP16, DUSP22, ACP5                                                                                                                                                                               | 3.36 |
| GO:0032496~<br>response to<br>lipopolysaccharide | 17 | 6.46E-<br>05 | ABR, SOCS3, SOCS1,<br>NFKBIA, ACP5, STAT1,<br>CXCL11, JUNB, TRIB1,<br>CXCL10, TNFRSF9, FOS,<br>NRF1, NLRC3, CXCL13,<br>FAS, EIF2AK2                                                                                                               | 3.29 |
| GO:0002376~<br>immune system<br>process          | 27 | 3.40E-<br>06 | MBL2, RSAD2, IL34,<br>LGR4, RNF125, CASP4,<br>FGA, TAP2, PYCARD,<br>ERAP1, MR1, MX1, MX2,<br>DHX58, HERC6, TLR13,<br>TRIM25, NLRP3, PSMB8,<br>PSMB9, C1QA, SARM1,<br>IRF7, IRF1, TAPBPL,<br>EIF2AK2, SEMA4A                                       | 2.85 |
| GO:0006629~ lipid<br>metabolic process           | 30 | 4.47E-<br>06 | ENPP6, SLC27A1, SC5D,<br>HMGCR, HSD17B12,<br>HMGCS1, ST8SIA1, LSS,<br>ASAHI, FDFT1, ELOVL1,<br>MTMR3, APOA1, CH25H,<br>APOF, ELOVL2, PLCH1,<br>INSIG1, SRD5A1, SCD4,<br>HSD17B7, NSDHL, EBP,<br>MSMO1, PLD4, FADS3,<br>CRAT, PCK1, PTGDS,<br>LIPG | 2.63 |
| GO:0045087~<br>innate immune<br>response         | 22 | 0.00113<br>1 | MBL2, TLR13, HERC6,<br>RSAD2, TRIM25, NLRP3,<br>IL34, LGR4, C1QA,<br>CYBB, SARM1, CASP4,<br>FGA, IRF7, PYCARD,<br>IRF1, FCER1G, MR1,<br>EIF2AK2, MX1, MX2,<br>DHX58                                                                               | 2.20 |

|                                 |    |              |                                                                                                                                                   |      |
|---------------------------------|----|--------------|---------------------------------------------------------------------------------------------------------------------------------------------------|------|
| GO:0042493~<br>response to drug | 19 | 0.00510<br>8 | MAT2A, SOCS3,<br>LGALS1, SOCS1,<br>GRIN2A, HMGCS1, IGF2,<br>STAT1, JUNB, ADA,<br>FOS, CYBB, MTHFR,<br>APOA1, CRH, HSD11B2,<br>SRD5A1, FAS, IGFBP2 | 2.07 |
|---------------------------------|----|--------------|---------------------------------------------------------------------------------------------------------------------------------------------------|------|

**Exclusively regulated GO terms in Skull 7dpi (Figure 2B)**

| <b>GO Term</b>                                                                               | <b>Number of<br/>genes</b> | <b>p-value</b> | <b>Genes</b>                                                                                           | <b>Fold<br/>Enrichment</b> |
|----------------------------------------------------------------------------------------------|----------------------------|----------------|--------------------------------------------------------------------------------------------------------|----------------------------|
| GO:0042493~<br>response to drug                                                              | 10                         | 3.15E-<br>04   | TXNIP, COL18A1, ARG1,<br>MMP9, NPPC, CRH,<br>HMGCS1, GNPAT,<br>SRD5A1, ABCC2                           | 4.59                       |
| GO:0014074~<br>response to purine-<br>containing<br>compound                                 | 3                          | 6.98E-<br>04   | HIF1A, SLC6A1,<br>HMGCS1                                                                               | 72.61                      |
| GO:0000122~<br>negative regulation<br>of transcription from<br>RNA polymerase II<br>promoter | 13                         | 0.00125<br>5   | ZFP36, TXNIP, STAT6,<br>KLF5, IFI27, HIF1A,<br>BCL11A, MNT, BCL6B,<br>BHLHE40, NFIL3,<br>TAGLN3, FOXP2 | 2.98                       |
| GO:0048546~<br>digestive tract<br>morphogenesis                                              | 3                          | 0.00487<br>5   | EGFR, HIF1A, STRA6                                                                                     | 28.24                      |
| GO:0006694~<br>steroid biosynthetic<br>process                                               | 4                          | 0.00572<br>3   | HSD3B4, HMGCS1, LSS,<br>SRD5A1                                                                         | 10.93                      |

|                                                      |   |              |                            |       |
|------------------------------------------------------|---|--------------|----------------------------|-------|
| GO:0071353~<br>cellular response to<br>interleukin-4 | 3 | 0.00930<br>8 | ARG1, NFIL3, TUBA1B        | 20.33 |
| GO:0043627~<br>response to estrogen                  | 4 | 0.00967<br>5 | ADRB2, CRH, MSTN,<br>ABCC2 | 9.04  |

**Table S5.** RNAseq data depicting the Gene Ontology terms Biological Processes significantly enriched in an ECM-related gene set (69 genes) regulated exclusively 3 days after skull injury (Related to Figure 2E).

| <b>Pathway</b>                               | <b>Number of genes</b> | <b>p-value</b> | <b>Fold Enrichment</b> |
|----------------------------------------------|------------------------|----------------|------------------------|
| immune system process                        | 21                     | 3.65E-12       | 5.96                   |
| immune response                              | 14                     | 9.70E-09       | 6.3                    |
| immune effector process                      | 7                      | 3.20E-07       | 12.08                  |
| positive regulation of immune system process | 10                     | 5.80E-07       | 6.9                    |
| regulation of immune system process          | 12                     | 3.34E-06       | 4.78                   |
| protein activation cascade                   | 6                      | 4.13E-06       | 11.29                  |
| positive regulation of immune response       | 6                      | 2.38E-05       | 8.87                   |
| complement activation                        | 4                      | 7.12E-05       | 13.8                   |
| T cell activation                            | 4                      | 7.12E-05       | 13.8                   |
| regulation of immune response                | 6                      | 2.43E-04       | 6.21                   |
| humoral immune response                      | 4                      | 3.08E-04       | 10.35                  |
| proteolysis                                  | 17                     | 4.09E-04       | 2.41                   |
| response to stimulus                         | 24                     | 5.34E-04       | 1.97                   |
| activation of immune response                | 4                      | 8.58E-04       | 8.28                   |

**Table S6.** Microarray data illustrating the GO Terms Biological Processes enriched in genes exclusively regulated 3 days after skull injury (related to Figure 2H).

| GO Term                                                      | Number of genes | p-value         | Genes                                                                                       | Fold Enrichment |
|--------------------------------------------------------------|-----------------|-----------------|---------------------------------------------------------------------------------------------|-----------------|
| GO:0051607~ defense response to virus                        | 5               | 7.77E-04        | PTPRC, CARD9, RSAD2, NLRP3, TLR8                                                            | 11.31           |
| GO:0042439~ ethanolamine and derivative metabolic process    | 5               | 0.001623<br>474 | ENPP6, PCYT1A, ETNK2, FABP5, PNPLA6                                                         | 9.43            |
| GO:0045667~ regulation of osteoblast differentiation         | 5               | 0.006589<br>917 | TWSG1, UCMA, SOX2, CD276, CTNNB1                                                            | 6.53            |
| GO:0009615~ response to virus                                | 10              | 3.75E-04        | PTPRC, CARD9, ISG15, IRF7, RSAD2, MX1, NLRP3, EIF2AK2, MX2, TLR8                            | 4.47            |
| GO:0006576~ biogenic amine metabolic process                 | 9               | 0.002380<br>975 | SAT1, ENPP6, SAT2, GRIN2A, SLC22A4, PCYT1A, ETNK2, FABP5, PNPLA6                            | 3.82            |
| GO:0045087~ innate immune response                           | 10              | 0.004257<br>998 | C1QA, CIITA, MBL2, PTPN6, C4B, TLR13, MX1, MX2, TLR8, DHX58                                 | 3.17            |
| GO:0006006~ glucose metabolic process                        | 13              | 8.73E-04        | RBP4, PDK2, SLC37A4, PHKA1, PPP3R2, IGF2, CAR5A, CPT1A, PCK1, PPP1R3E, PPP1R3C, FABP5, MDH2 | 3.15            |
| GO:0002252~ immune effector process                          | 11              | 0.004026<br>952 | C1QA, MBL2, PTPN6, PTPRC, CARD9, C4B, IRF7, RSAD2, NLRP3, H2-DMA, TLR8                      | 2.96            |
| GO:0006575~ cellular amino acid derivative metabolic process | 12              | 0.002987<br>015 | SAT1, ENPP6, PCYOX1L, P4HA1, SAT2, GRIN2A, SLC22A4, PCYT1A, ETNK2, CDO1, FABP5, PNPLA6      | 2.89            |



|                                                            |    |                 |                                                                                                                                                                                     |      |
|------------------------------------------------------------|----|-----------------|-------------------------------------------------------------------------------------------------------------------------------------------------------------------------------------|------|
| GO:0019318~<br>hexose<br>metabolic<br>process              | 13 | 0.004260<br>456 | RBP4, PDK2, SLC37A4,<br>PHKA1, PPP3R2, IGF2,<br>CAR5A, CPT1A, PCK1,<br>PPP1R3E, PPP1R3C, FABP5,<br>MDH2                                                                             | 2.61 |
| GO:0007507~<br>heart<br>development                        | 17 | 9.31E-04        | NOX4, NRP2, RBP4, GJA1,<br>GJA5, SUFU, CTNNB1, GJC1,<br>ALDH1A2, SALL4, OSR1,<br>JMJD6, PBRM1, RARA,<br>FOXC1, NCOR2, ACVR1                                                         | 2.59 |
| GO:0001701~<br>in utero<br>embryonic<br>development        | 20 | 3.55E-04        | GNA13, FGFR1, CEBPB,<br>ESRRB, SOCS3, MYO1E,<br>GJA1, MBNL1, CAPN2,<br>UBE2B, ASCL2, SIN3A,<br>SALL4, PDGFRA, BTF3,<br>ETNK2, HS6ST1, FOXC1,<br>NCOR2, ACVR1                        | 2.54 |
| GO:0009611~<br>response to<br>wounding                     | 25 | 9.59E-05        | GNA13, CIITA, PTPN6, MBL2,<br>F10, C4B, F13A1, TLR13,<br>GRIN2A, GJA1, ABHD2,<br>NLRP3, CXCL11, TLR8,<br>C1QA, FGA, SLC7A2, HRH4,<br>CD81, PYCARD, APOH,<br>NEFL, KDM6B, ACVR1, FN1 | 2.44 |
| GO:0001775~<br>cell activation                             | 17 | 0.002560<br>972 | FYB, GNA13, PTPRC, CRIP3,<br>LRRC8A, SKAP2, CTNNB1,<br>WBP2NL, NLRC3, FGA,<br>JMJD6, SLC7A2, BCL11A,<br>IRF1, NDRG1, H2-DMA, LCP2                                                   | 2.35 |
| GO:0032787~<br>monocarboxylic<br>acid metabolic<br>process | 18 | 0.002481<br>588 | SLC27A1, RBP4, SLC37A4,<br>ABHD5, PRKAG2, ACACA,<br>CAR5A, ACOT5, MTHFD1L,<br>CPT1A, PCK1, ALDH1A2,<br>PTGDS, P4HA1, CH25H,<br>ELOVL2, SLC22A4, GPAM                                | 2.28 |

|                                                                               |    |                 |                                                                                                                                                                                                                |      |
|-------------------------------------------------------------------------------|----|-----------------|----------------------------------------------------------------------------------------------------------------------------------------------------------------------------------------------------------------|------|
| GO:0001568~<br>blood vessel<br>development                                    | 16 | 0.005784<br>728 | GNA13, FGFR1, SOCS3,<br>MYO1E, GJA1, GJA5, MMP2,<br>PNPLA6, GJC1, CTNNB1,<br>ALDH1A2, JMJD6, HS6ST1,<br>FOXC1, PPAP2B, ACVR1                                                                                   | 2.23 |
| GO:0035295~<br>tube<br>development                                            | 17 | 0.005065<br>508 | GNA13, FGFR1, RBP4, GJA1,<br>GJA5, LGR4, SUFU, CTNNB1,<br>ALDH1A2, JMJD6, PDGFRA,<br>RARA, HS6ST1, FOXC1,<br>ADAMTS2, FOXD1, ACVR1                                                                             | 2.19 |
| GO:0043009~<br>chordate<br>embryonic<br>development                           | 27 | 3.03E-04        | GNA13, FGFR1, RBP4, GJA1,<br>SUFU, SIN3A, BTF3, HS6ST1,<br>ETL4, ETNK2, ALX3, CEBPB,<br>SOCS3, ESRRB, MYO1E,<br>GAS1, MBNL1, CAPN2,<br>UBE2B, ASCL2, ACVR2A,<br>SALL4, PDGFRA, FOXC1,<br>RIPPLY2, NCOR2, ACVR1 | 2.18 |
| GO:0001944~<br>vasculature<br>development                                     | 16 | 0.007190<br>723 | GNA13, FGFR1, SOCS3,<br>MYO1E, GJA1, GJA5, MMP2,<br>PNPLA6, GJC1, CTNNB1,<br>ALDH1A2, JMJD6, HS6ST1,<br>FOXC1, PPAP2B, ACVR1                                                                                   | 2.17 |
| GO:0009792~<br>embryonic<br>development<br>ending in birth<br>or egg hatching | 27 | 3.48E-04        | GNA13, FGFR1, RBP4, GJA1,<br>SUFU, SIN3A, BTF3, HS6ST1,<br>ETL4, ETNK2, ALX3, CEBPB,<br>SOCS3, ESRRB, MYO1E,<br>GAS1, MBNL1, CAPN2,<br>UBE2B, ASCL2, ACVR2A,<br>SALL4, PDGFRA, FOXC1,<br>RIPPLY2, NCOR2, ACVR1 | 2.16 |
| GO:0006066~<br>alcohol<br>metabolic<br>process                                | 22 | 0.002280<br>423 | PDK2, RBP4, ENPP6, PHKA1,<br>SLC37A4, GRIN2A, PPP3R2,<br>IGF2, CAR5A, GPD4,<br>PNPLA6, CPT1A, FDFT1,<br>PCK1, PPP1R3E, PPP1R3C,<br>CH25H, APOF, PCYT1A,<br>ETNK2, FABP5, MDH2                                  | 2.07 |

**Table S7.** RNAseq data showing the GO Terms Biological Processes (PANTHER) upregulated after brain injury in zebrafish Olig2<sup>+</sup> cells (Related to Figure S7C, GO Terms marked in red are shown in the graph S7C).

| GO Term                                                            | Number of genes | FDR-value | Fold Enrichment |
|--------------------------------------------------------------------|-----------------|-----------|-----------------|
| toll-like receptor signaling pathway                               | 12              | 4,59E-05  | 9,15            |
| pattern recognition receptor signaling pathway                     | 14              | 5,79E-06  | 9,08            |
| activation of innate immune response                               | 14              | 1,86E-05  | 7,89            |
| response to chemokine                                              | 16              | 1,27E-04  | 5,32            |
| innate immune response                                             | 27              | 6,74E-07  | 4,55            |
| response to lipopolysaccharide                                     | 13              | 4,43E-03  | 4,44            |
| immune response                                                    | 80              | 1,37E-20  | 4,41            |
| defense response                                                   | 60              | 5,34E-13  | 3,83            |
| response to cytokine                                               | 32              | 3,16E-06  | 3,55            |
| cell migration                                                     | 75              | 5,83E-07  | 2,25            |
| carbohydrate metabolic process                                     | 36              | 9,54E-03  | 2,12            |
| chemotaxis                                                         | 48              | 7,46E-04  | 2,12            |
| innate immune response-activating signal transduction (GO:0002758) | 14              | 5,66E-06  | 9,08            |
| positive regulation of defense response (GO:0031349)               | 17              | 4,24E-06  | 6,89            |
| positive regulation of innate immune response (GO:0045089)         | 16              | 1,37E-05  | 6,69            |
| positive regulation of response to biotic stimulus (GO:0002833)    | 16              | 1,34E-05  | 6,69            |
| immune response-activating signal transduction (GO:0002757)        | 27              | 2,38E-09  | 6,48            |
| activation of immune response (GO:0002253)                         | 32              | 1,04E-10  | 6,19            |
| immune response-regulating signaling pathway (GO:0002764)          | 27              | 6,94E-09  | 6,04            |
| neutrophil migration (GO:1990266)                                  | 24              | 1,55E-07  | 5,76            |
| neutrophil chemotaxis (GO:0030593)                                 | 22              | 7,03E-07  | 5,71            |
| humoral immune response (GO:0006959)                               | 13              | 6,81E-04  | 5,62            |

|                                                                                 |    |          |      |
|---------------------------------------------------------------------------------|----|----------|------|
| chemokine-mediated signaling pathway (GO:0070098)                               | 16 | 7,51E-05 | 5,61 |
| granulocyte migration (GO:0097530)                                              | 24 | 3,08E-07 | 5,46 |
| myeloid leukocyte migration (GO:0097529)                                        | 26 | 8,72E-08 | 5,44 |
| leukocyte chemotaxis (GO:0030595)                                               | 25 | 1,83E-07 | 5,4  |
| granulocyte chemotaxis (GO:0071621)                                             | 22 | 1,56E-06 | 5,38 |
| cellular response to chemokine (GO:1990869)                                     | 16 | 1,29E-04 | 5,32 |
| immune response-activating cell surface receptor signaling pathway (GO:0002429) | 13 | 1,14E-03 | 5,27 |
| positive regulation of immune response (GO:0050778)                             | 36 | 1,83E-10 | 5,19 |
| positive regulation of response to external stimulus (GO:0032103)               | 18 | 6,47E-05 | 4,97 |
| leukocyte migration (GO:0050900)                                                | 26 | 3,20E-07 | 4,96 |
| positive regulation of multi-organism process (GO:0043902)                      | 17 | 1,44E-04 | 4,9  |
| response to virus (GO:0009615)                                                  | 19 | 4,56E-05 | 4,83 |
| cell chemotaxis (GO:0060326)                                                    | 32 | 1,61E-08 | 4,72 |
| immune response-regulating cell surface receptor signaling pathway (GO:0002768) | 13 | 2,90E-03 | 4,68 |
| inflammatory response (GO:0006954)                                              | 37 | 1,09E-09 | 4,66 |
| regulation of innate immune response (GO:0045088)                               | 16 | 5,05E-04 | 4,61 |
| positive regulation of immune system process (GO:0002684)                       | 44 | 2,76E-11 | 4,56 |
| regulation of response to biotic stimulus (GO:0002831)                          | 17 | 3,55E-04 | 4,5  |
| regulation of immune response (GO:0050776)                                      | 39 | 2,48E-09 | 4,25 |
| response to molecule of bacterial origin (GO:0002237)                           | 13 | 6,38E-03 | 4,21 |
| response to external biotic stimulus (GO:0043207)                               | 66 | 8,31E-15 | 3,98 |
| response to other organism (GO:0051707)                                         | 66 | 6,23E-15 | 3,98 |

|                                                          |     |          |      |
|----------------------------------------------------------|-----|----------|------|
| cytokine-mediated signaling pathway (GO:0019221)         | 29  | 2,12E-06 | 3,96 |
| response to bacterium (GO:0009617)                       | 33  | 2,55E-07 | 3,96 |
| response to biotic stimulus (GO:0009607)                 | 66  | 7,38E-15 | 3,94 |
| regulation of defense response (GO:0031347)              | 21  | 1,81E-04 | 3,89 |
| defense response to other organism (GO:0098542)          | 41  | 6,19E-09 | 3,88 |
| regulation of immune system process (GO:0002682)         | 63  | 9,12E-14 | 3,85 |
| cellular response to cytokine stimulus (GO:0071345)      | 29  | 3,41E-06 | 3,84 |
| immune effector process (GO:0002252)                     | 17  | 2,19E-03 | 3,74 |
| carbohydrate derivative catabolic process (GO:1901136)   | 17  | 3,51E-03 | 3,56 |
| regulation of multi-organism process (GO:0043900)        | 18  | 2,30E-03 | 3,54 |
| leukocyte activation (GO:0045321)                        | 15  | 9,82E-03 | 3,47 |
| immune system process (GO:0002376)                       | 150 | 3,11E-25 | 3,02 |
| multi-organism process (GO:0051704)                      | 71  | 1,42E-10 | 2,89 |
| positive regulation of hydrolase activity (GO:0051345)   | 28  | 9,61E-03 | 2,36 |
| positive regulation of response to stimulus (GO:0048584) | 77  | 1,11E-06 | 2,16 |
| response to external stimulus (GO:0009605)               | 104 | 4,25E-09 | 2,16 |
| localization of cell (GO:0051674)                        | 75  | 3,20E-06 | 2,14 |
| cell motility (GO:0048870)                               | 75  | 3,12E-06 | 2,14 |
| taxis (GO:0042330)                                       | 48  | 1,70E-03 | 2,04 |

**Table S8.** RNAseq data depicting the Gene Ontology terms Biological Processes (PANTHER) significantly enriched in a gene set (597 genes) with normalized expression after Tlr1/2&Cxcr3 inhibitor treatment in zebrafish. (Related to Figure 5B).

| Pathway                               | Number of genes | p-value     | Fold Enrichment |
|---------------------------------------|-----------------|-------------|-----------------|
| mitotic cell cycle                    | 14              | 0,00812     | 2,18            |
| myelination                           | 5               | 0,00634     | 4,61            |
| regulation of endopeptidase activity  | 7               | 0,00256     | 4,05            |
| regulation of apoptotic process       | 17              | 0,00176     | 2,4             |
| ensheathment of neurons               | 6               | 0,00152     | 5,28            |
| response to chemokine                 | 6               | 0,000869    | 5,96            |
| response to tumor necrosis factor     | 6               | 0,000769    | 6,12            |
| cellular response to interferon-gamma | 5               | 0,0006      | 8,42            |
| regulation of GTPase activity         | 12              | 0,000469    | 3,32            |
| cytokine-mediated signaling pathway   | 10              | 0,000313    | 4,08            |
| response to interleukin-1             | 6               | 0,000251    | 7,75            |
| cell chemotaxis                       | 10              | 0,000178    | 4,4             |
| innate immune response                | 11              | 0,0000126   | 5,54            |
| defense response                      | 21              | 0,000000244 | 4,01            |
| immune system process                 | 43              | 5,37E-08    | 2,59            |

**Table S9.** RNAseq data depicting the Gene Ontology terms Biological Processes (PANTHER) significantly enriched in a gene set still regulated after inhibitor treatment. (Related to Figure 5).

| <b>Pathway</b>                                                   | <b>Number of genes</b> | <b>p-value</b> | <b>Fold Enrichment</b> |
|------------------------------------------------------------------|------------------------|----------------|------------------------|
| immune system process                                            | 9                      | 4.36E-05       | 6.70                   |
| immune response                                                  | 41                     | 1.7E-13        | 3.96                   |
| proteolysis involved in cellular protein catabolic process       | 19                     | 4.64E-13       | 9.43                   |
| inflammatory response                                            | 28                     | 5.06E-13       | 5.62                   |
| innate immune response                                           | 25                     | 1.01E-09       | 4.56                   |
| regulation of cell proliferation                                 | 19                     | 2.07E-07       | 4.48                   |
| carbohydrate metabolic process                                   | 22                     | 9.59E-07       | 3.56                   |
| peptidyl-tyrosine autophosphorylation                            | 10                     | 6.05E-06       | 7.26                   |
| proteolysis                                                      | 40                     | 1.14E-05       | 2.14                   |
| response to lipopolysaccharide                                   | 10                     | 5.44E-05       | 5.66                   |
| transmembrane receptor protein tyrosine kinase signaling pathway | 14                     | 5.98E-05       | 3.88                   |
